# Supplementary material for: Development of a novel humanized mouse model for improved evaluation of in vivo anti-cancer effects of anti-PD-1 antibody
Source: PubMed Central journal article supplement (PMC8548333; doi:10.1038/s41598-021-00641-8), 2021-10-26
Supplement: 41598_2021_641_MOESM2_ESM.pdf [file 41598_2021_641_MOESM2_ESM.pdf]

Title: Development of a novel humanized mouse model for improved evaluation of in vivo anti-cancer effects of anti-PD-1 antibody

Ikumi Katano, Asami Hanazawa, Iyo Otsuka, Takuya Yamaguchi, Misa Mochizuki, Kenji Kawai, Ryoji Ito, Motohito Goto, Takahiro Kagawa, Takeshi Takahashi

# Supplementary Figure 1

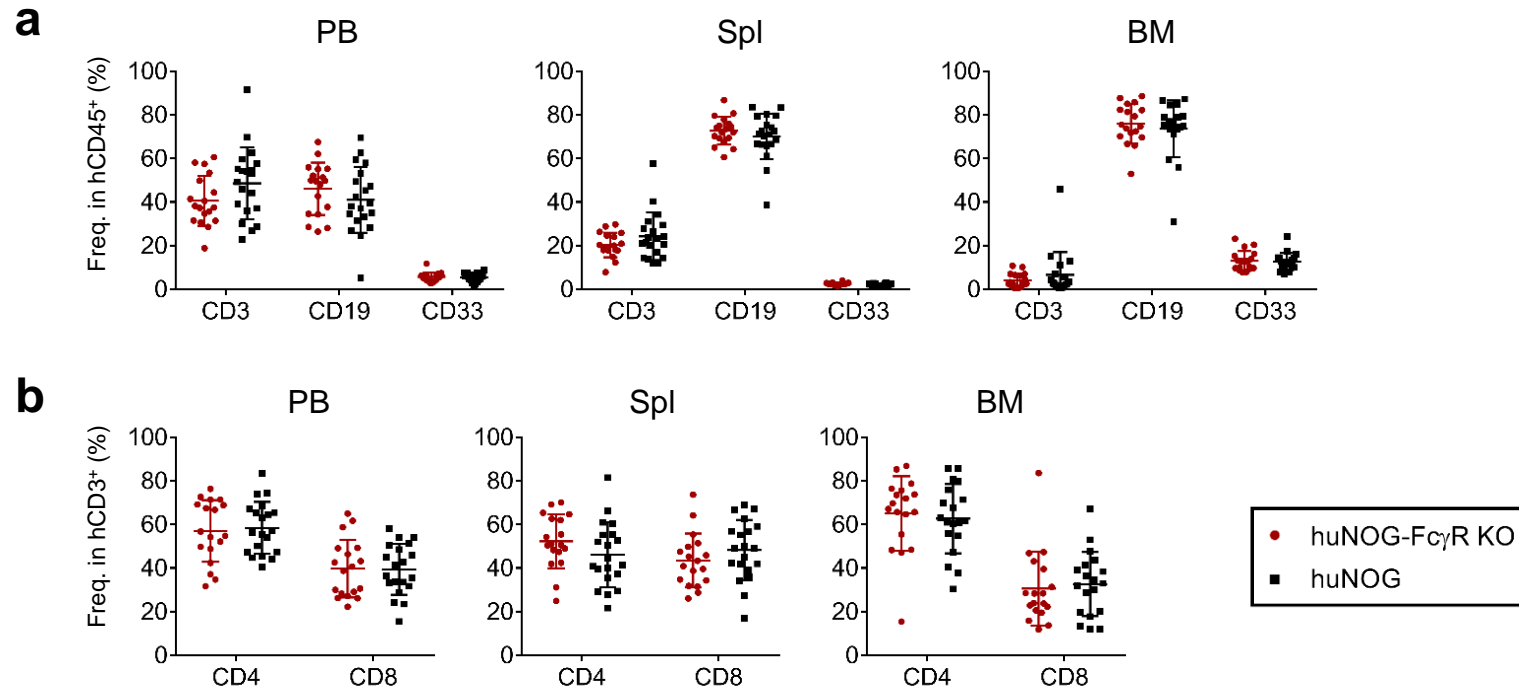

# Supplementary Figure 2

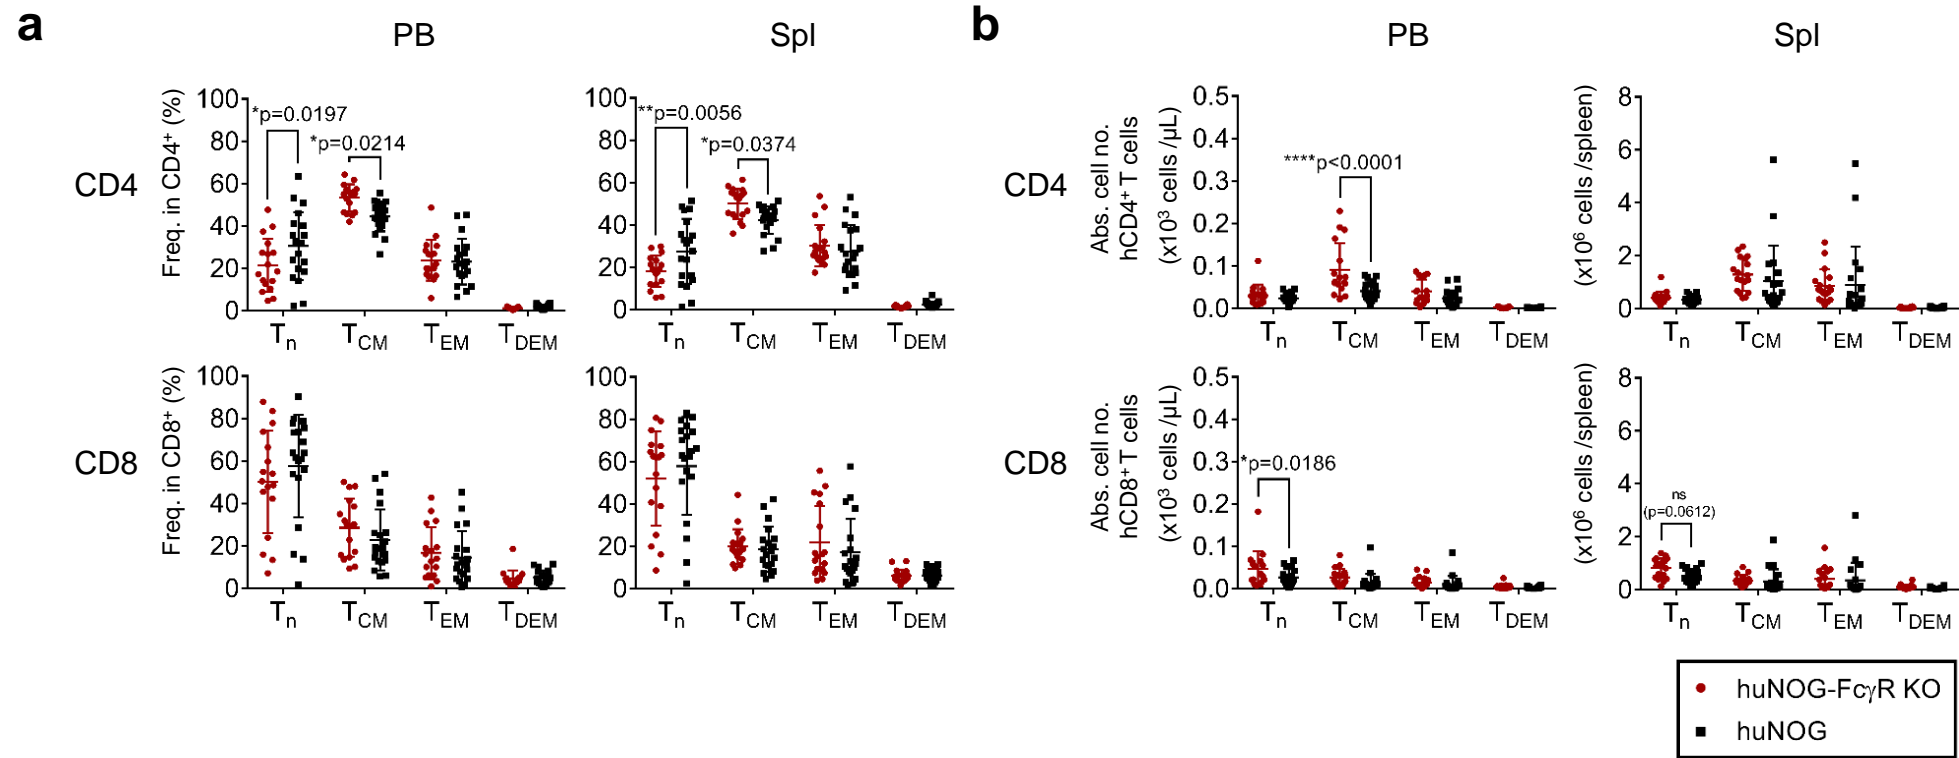

# Supplementary Figure 3

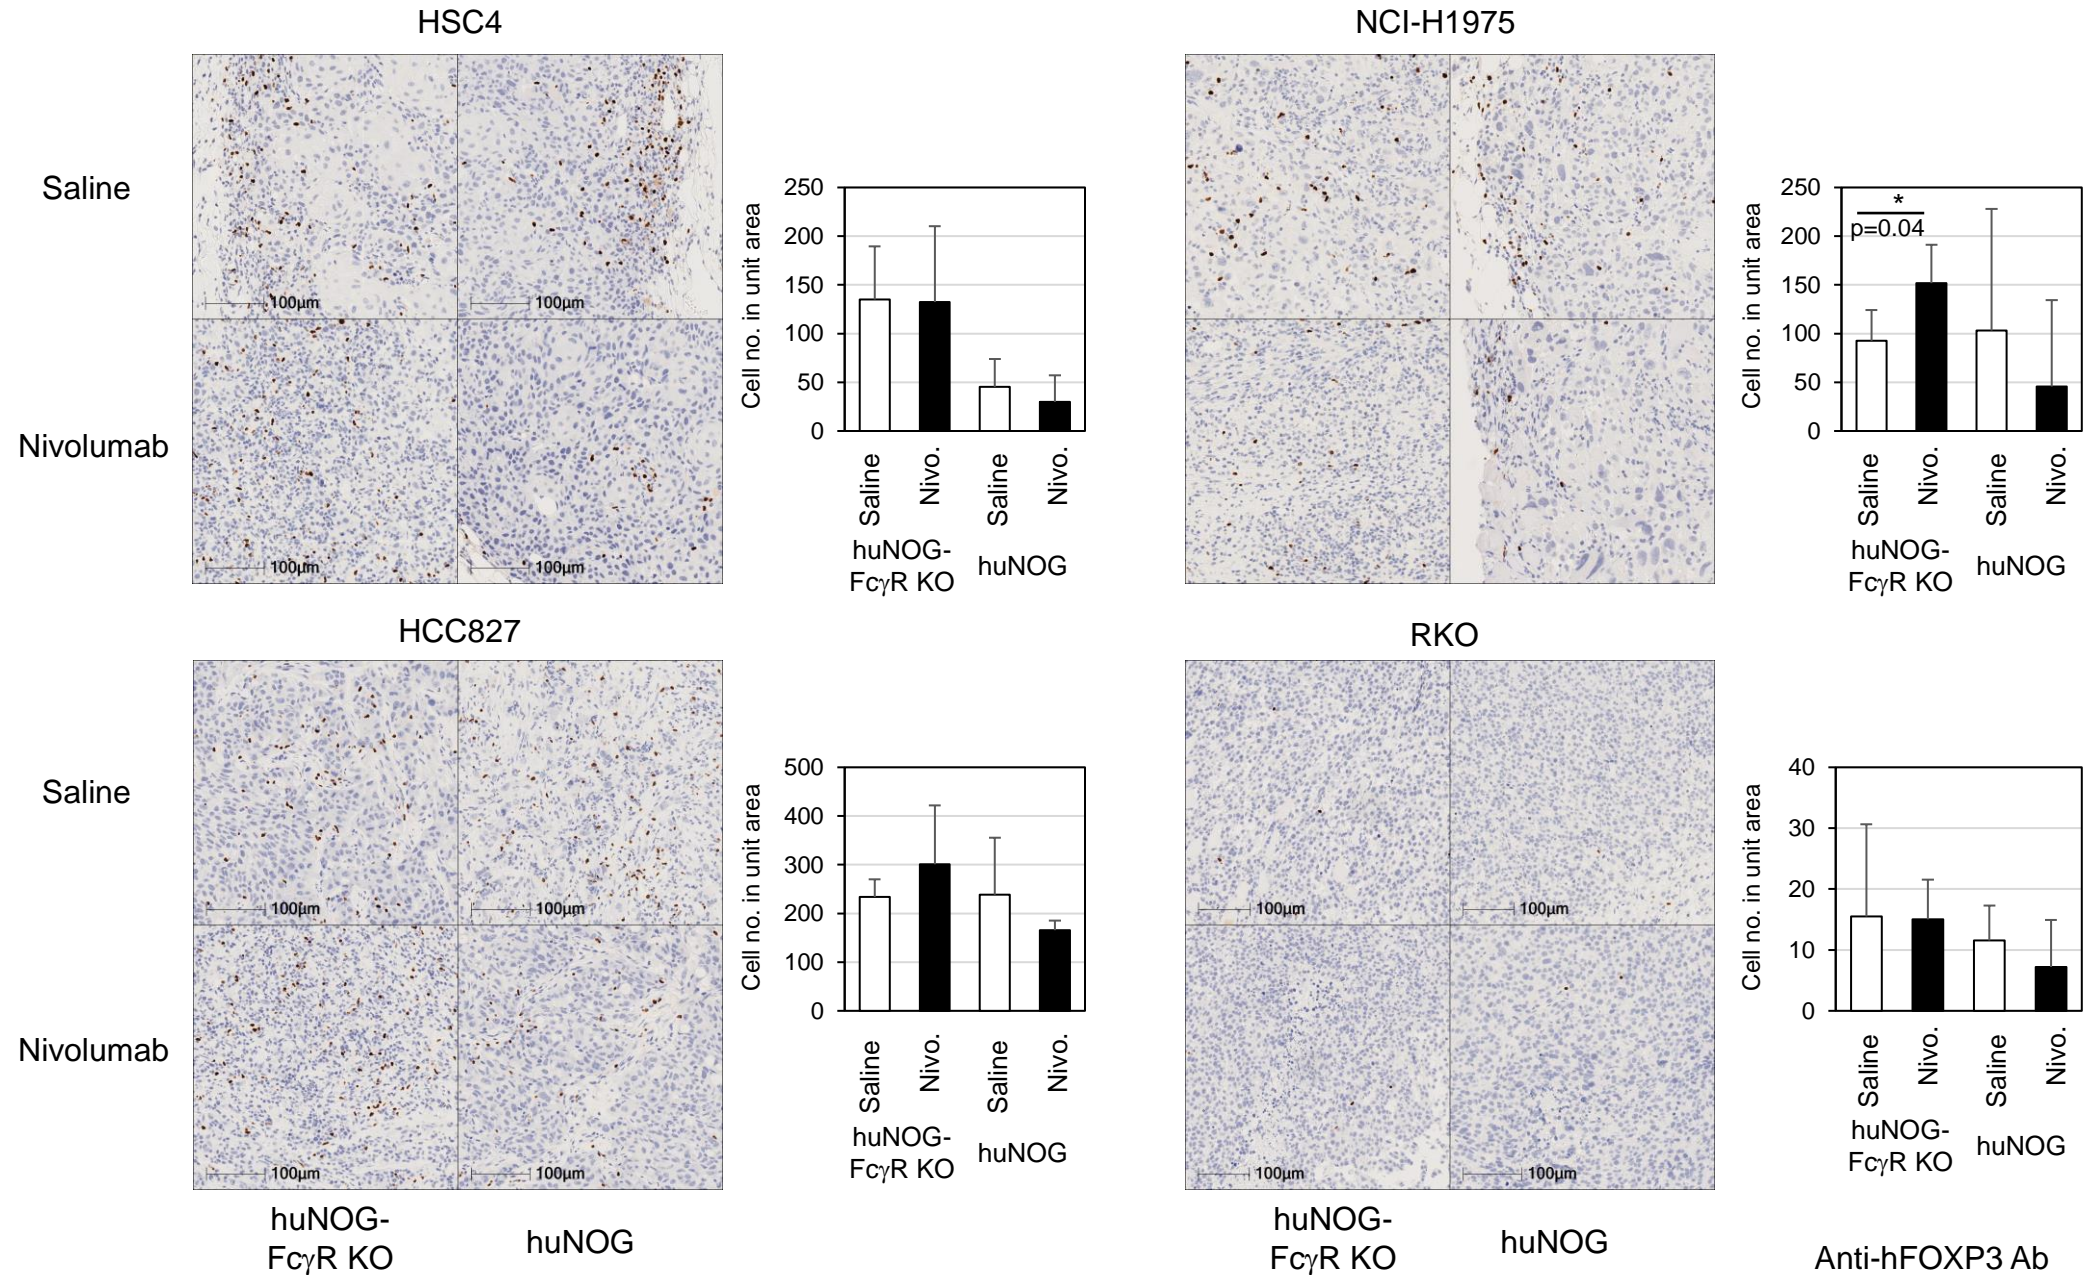



# Supplementary Figure 4

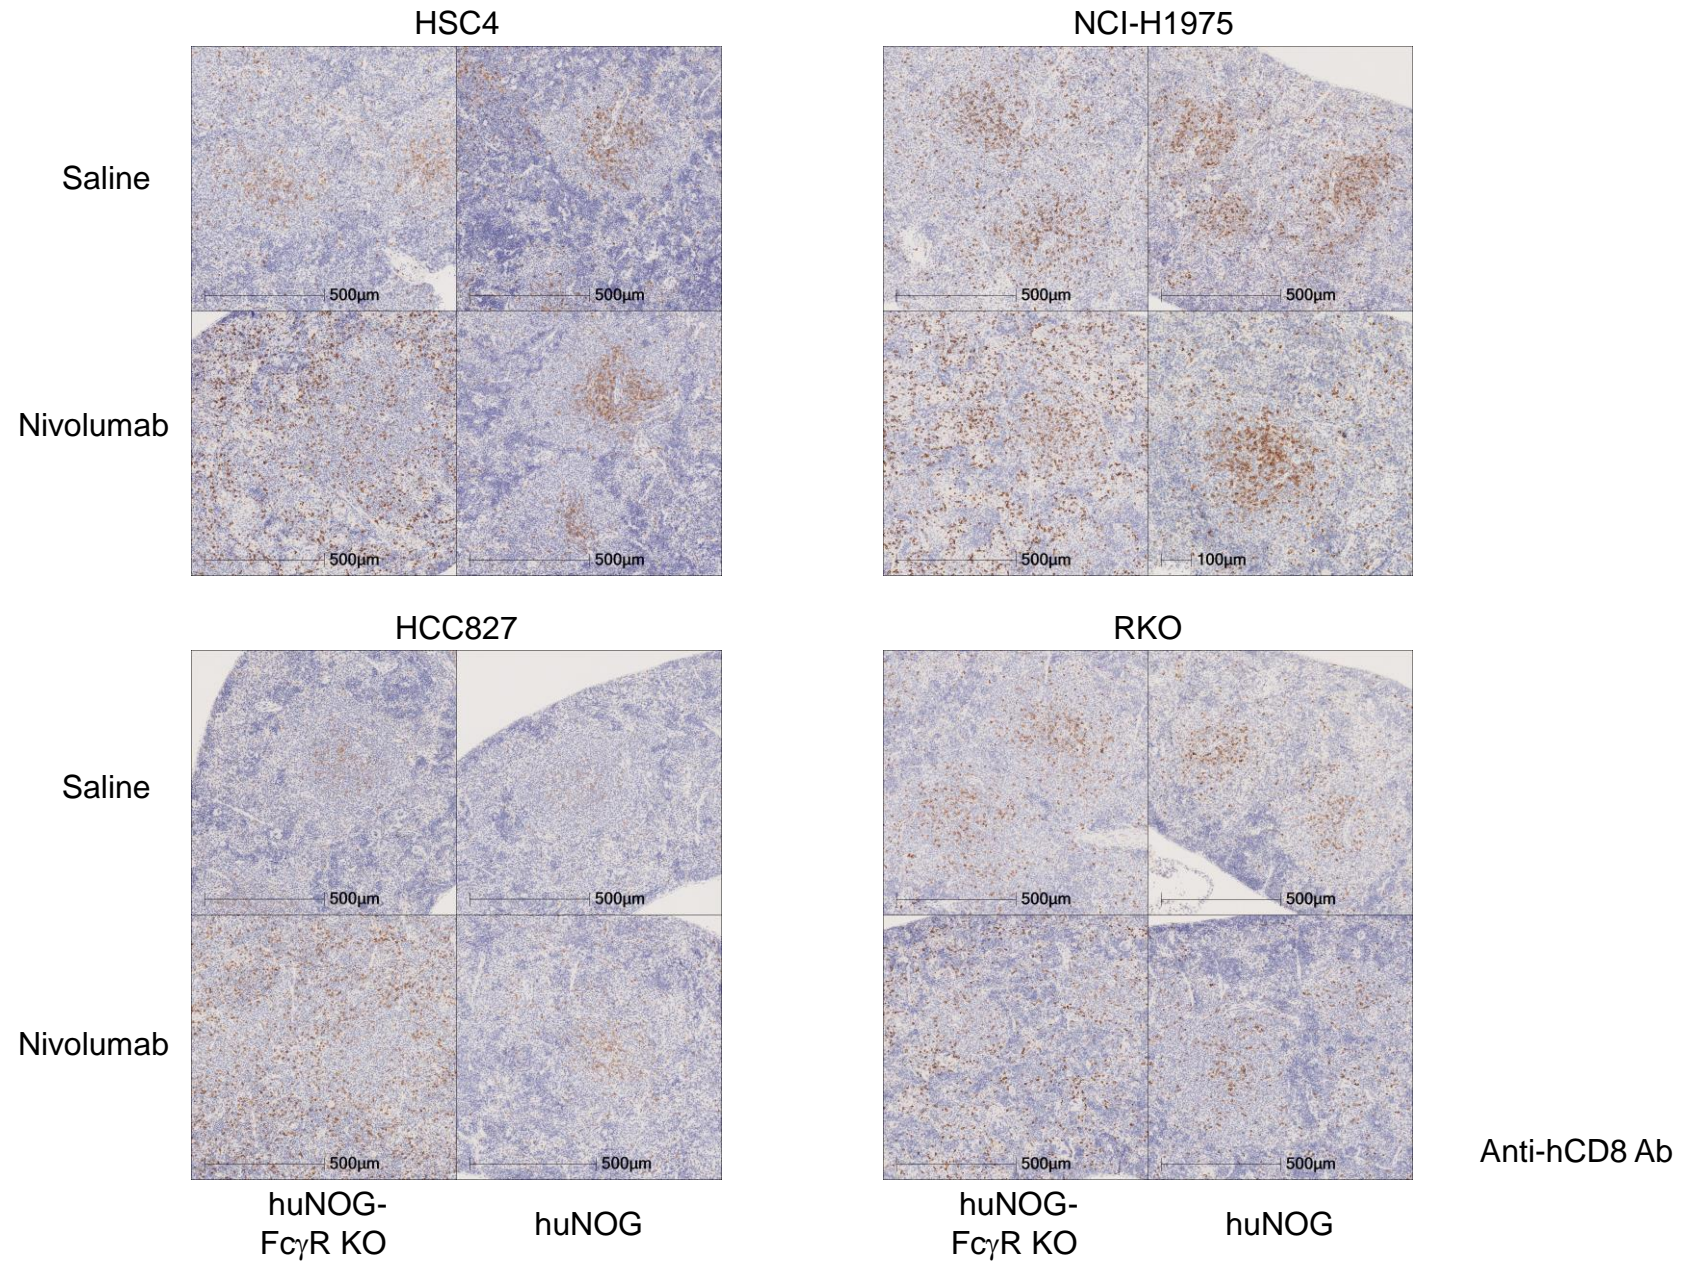



# Supplementary Figure 5

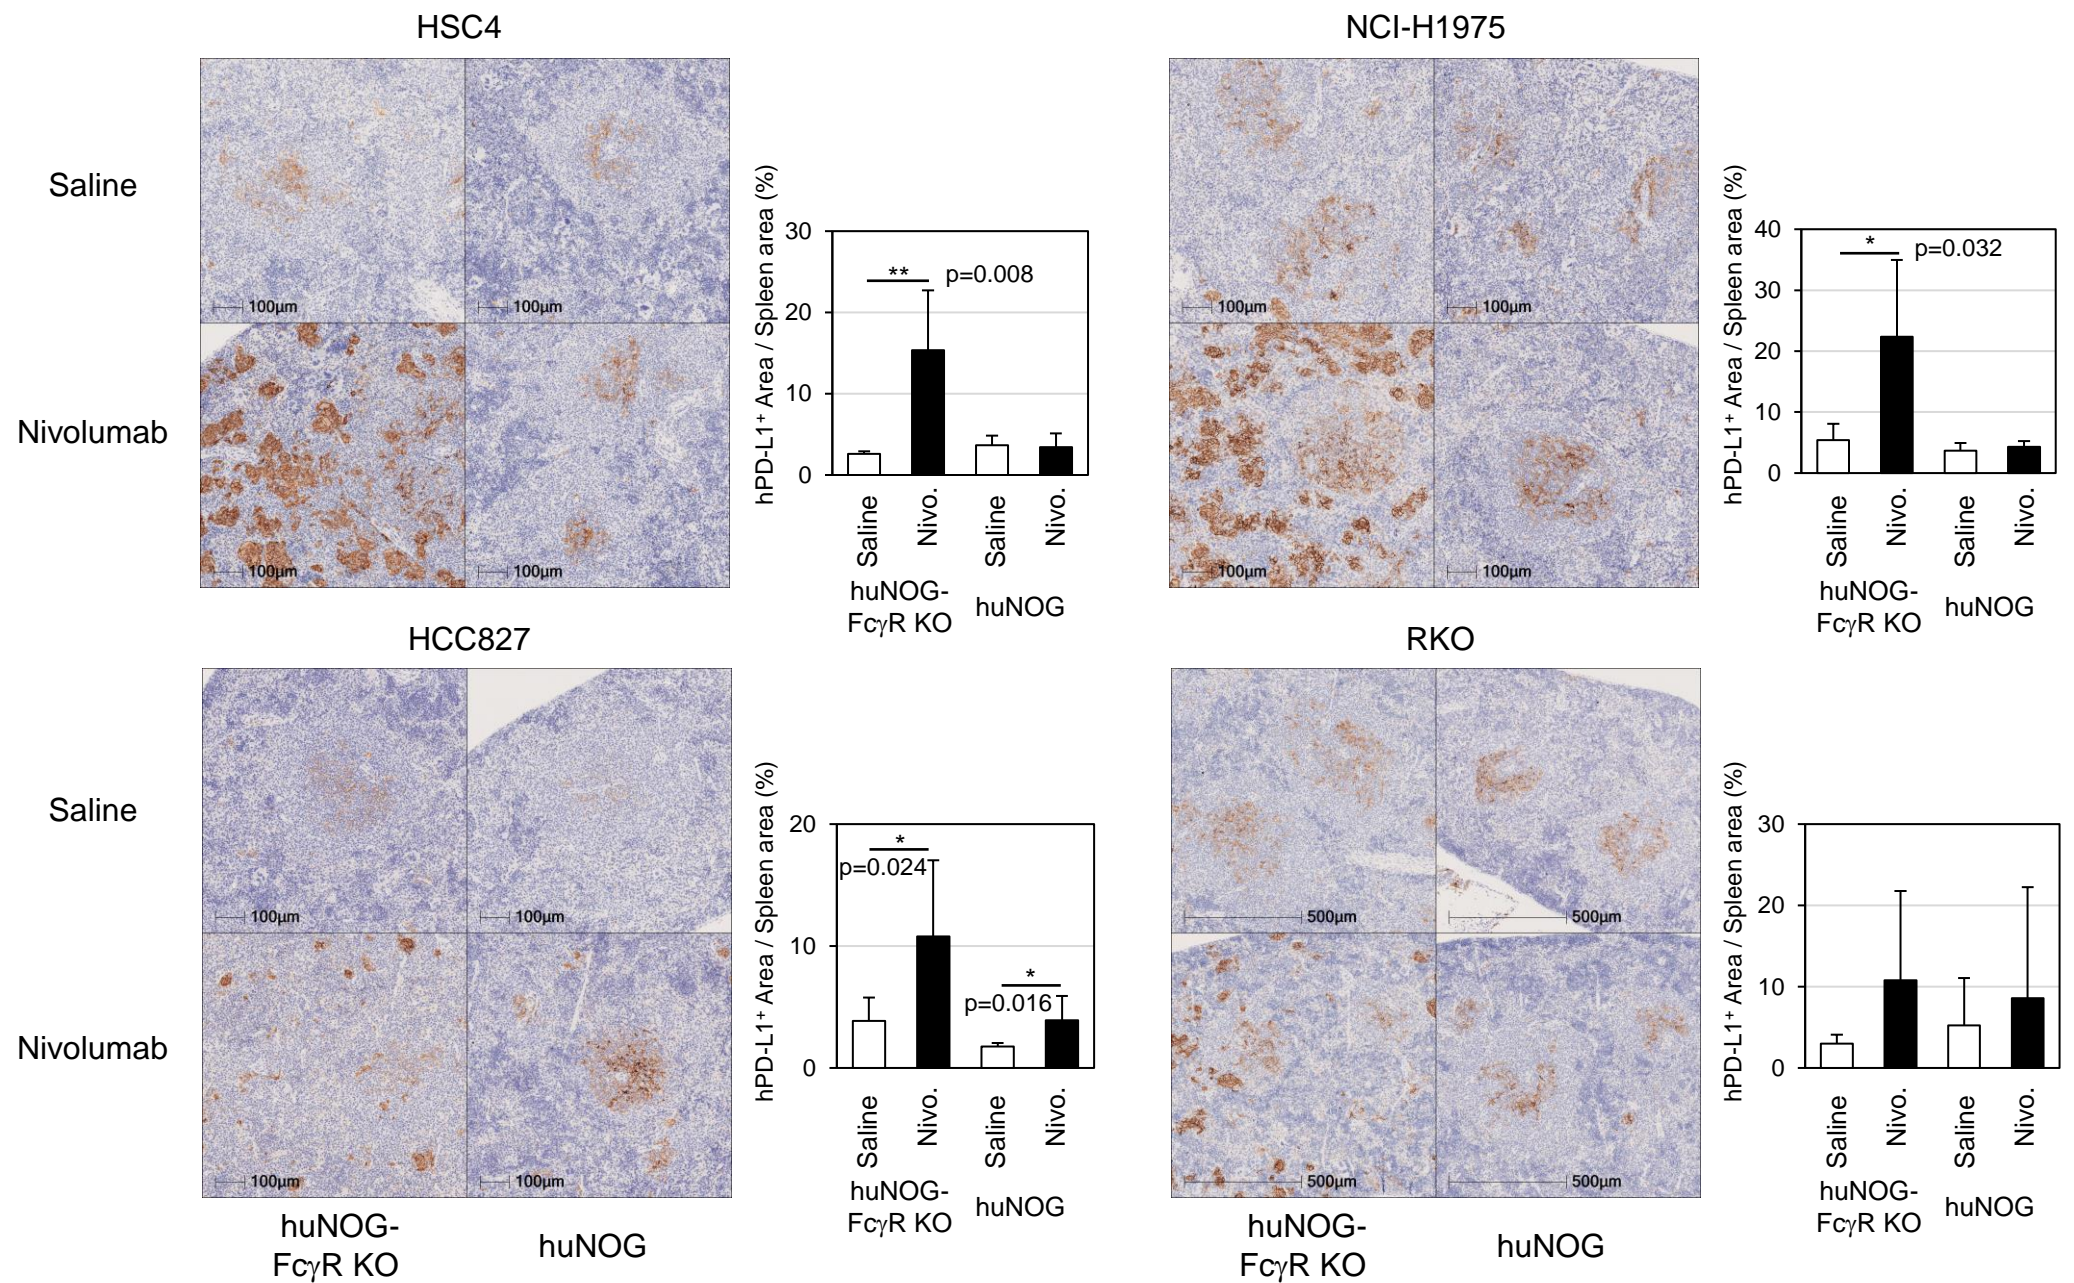

Anti-hPD-L1 Ab



# Supplementary Figure 6

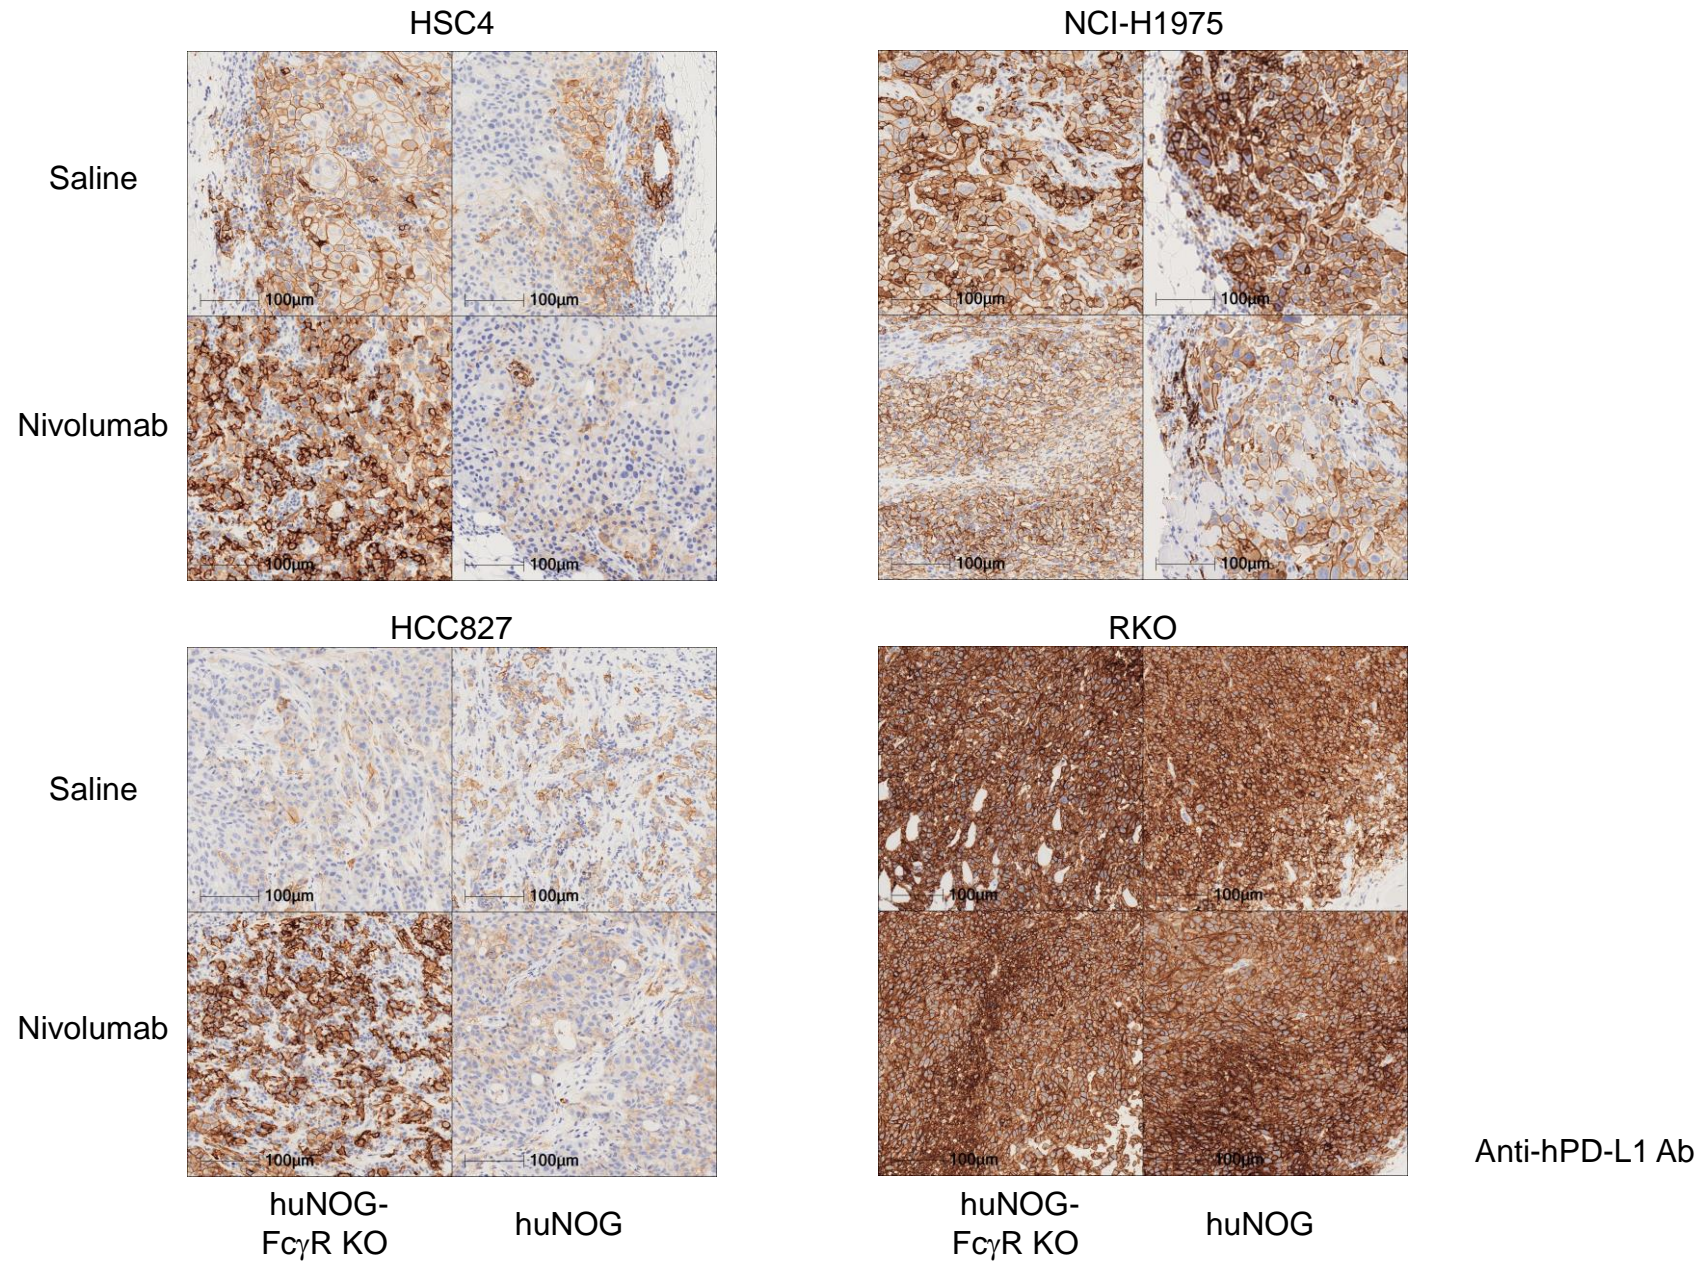

# Supplementary Figure 7

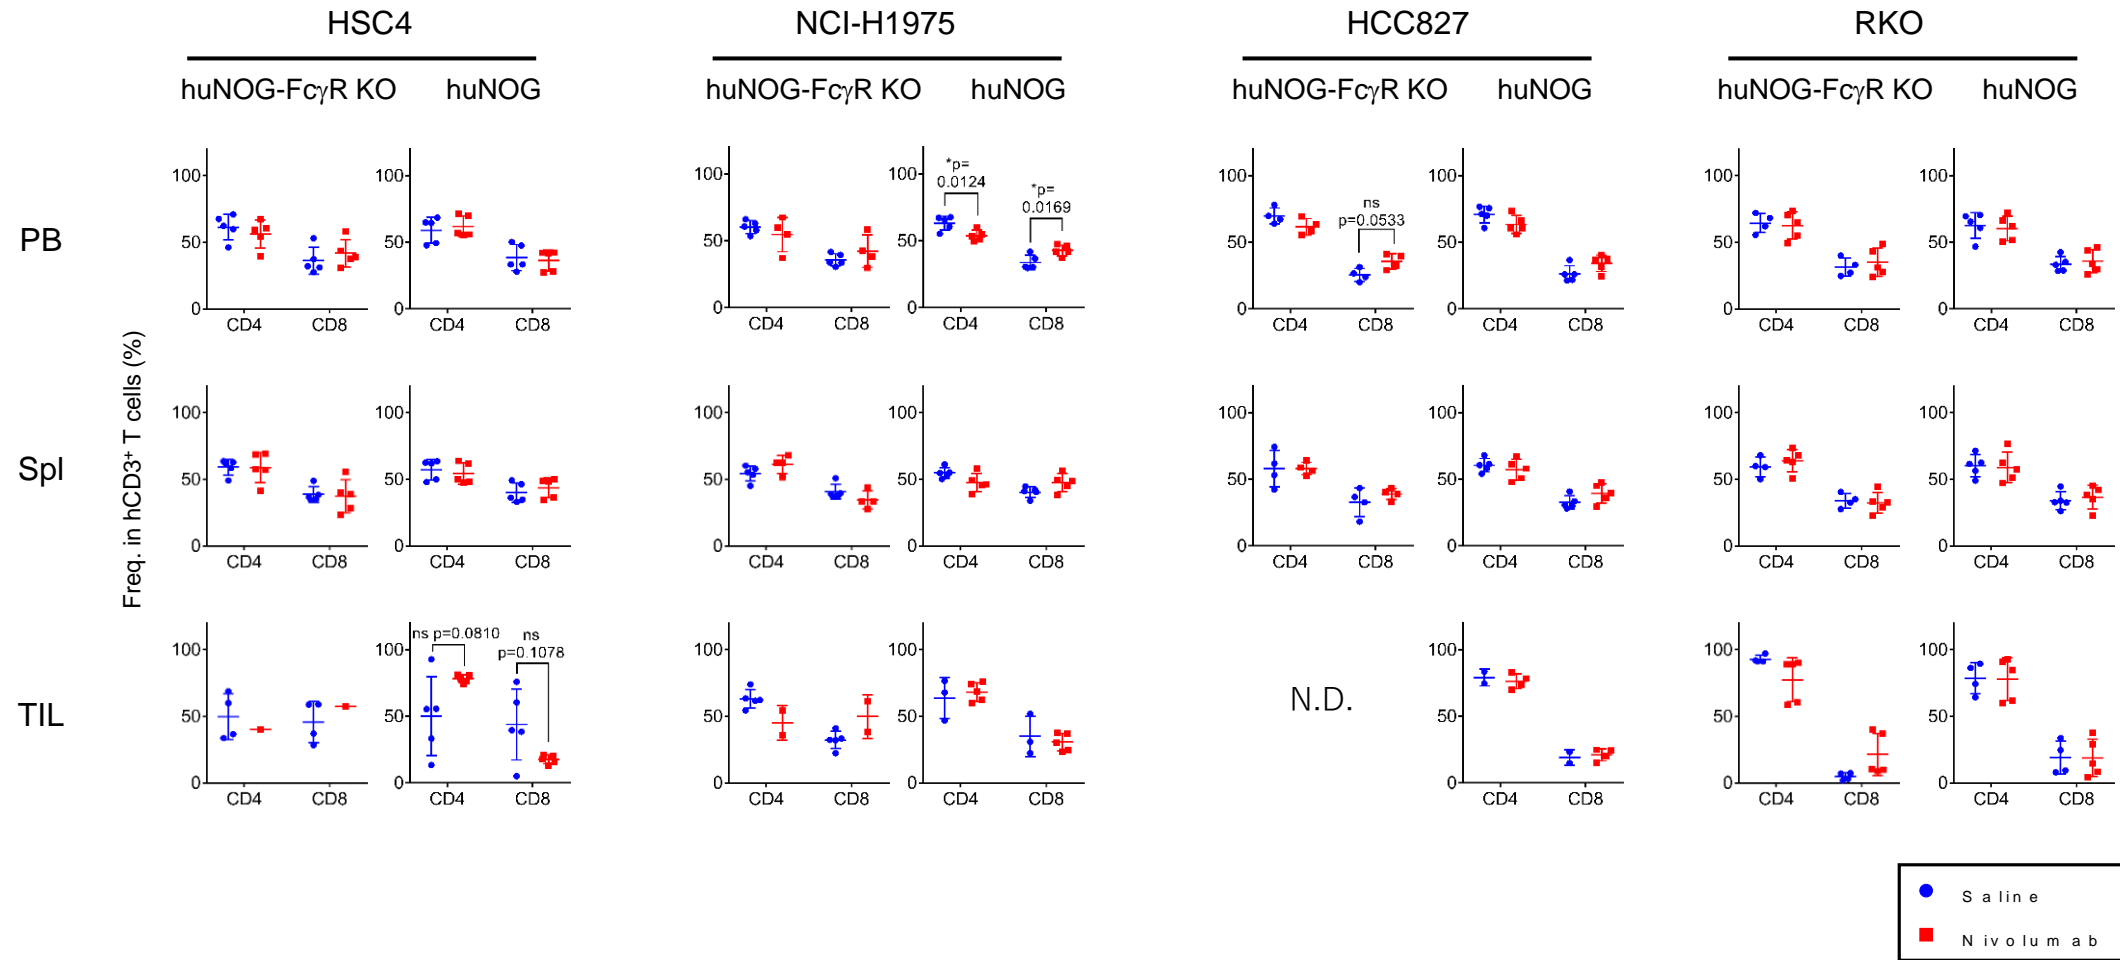



# Supplementary Figure 8

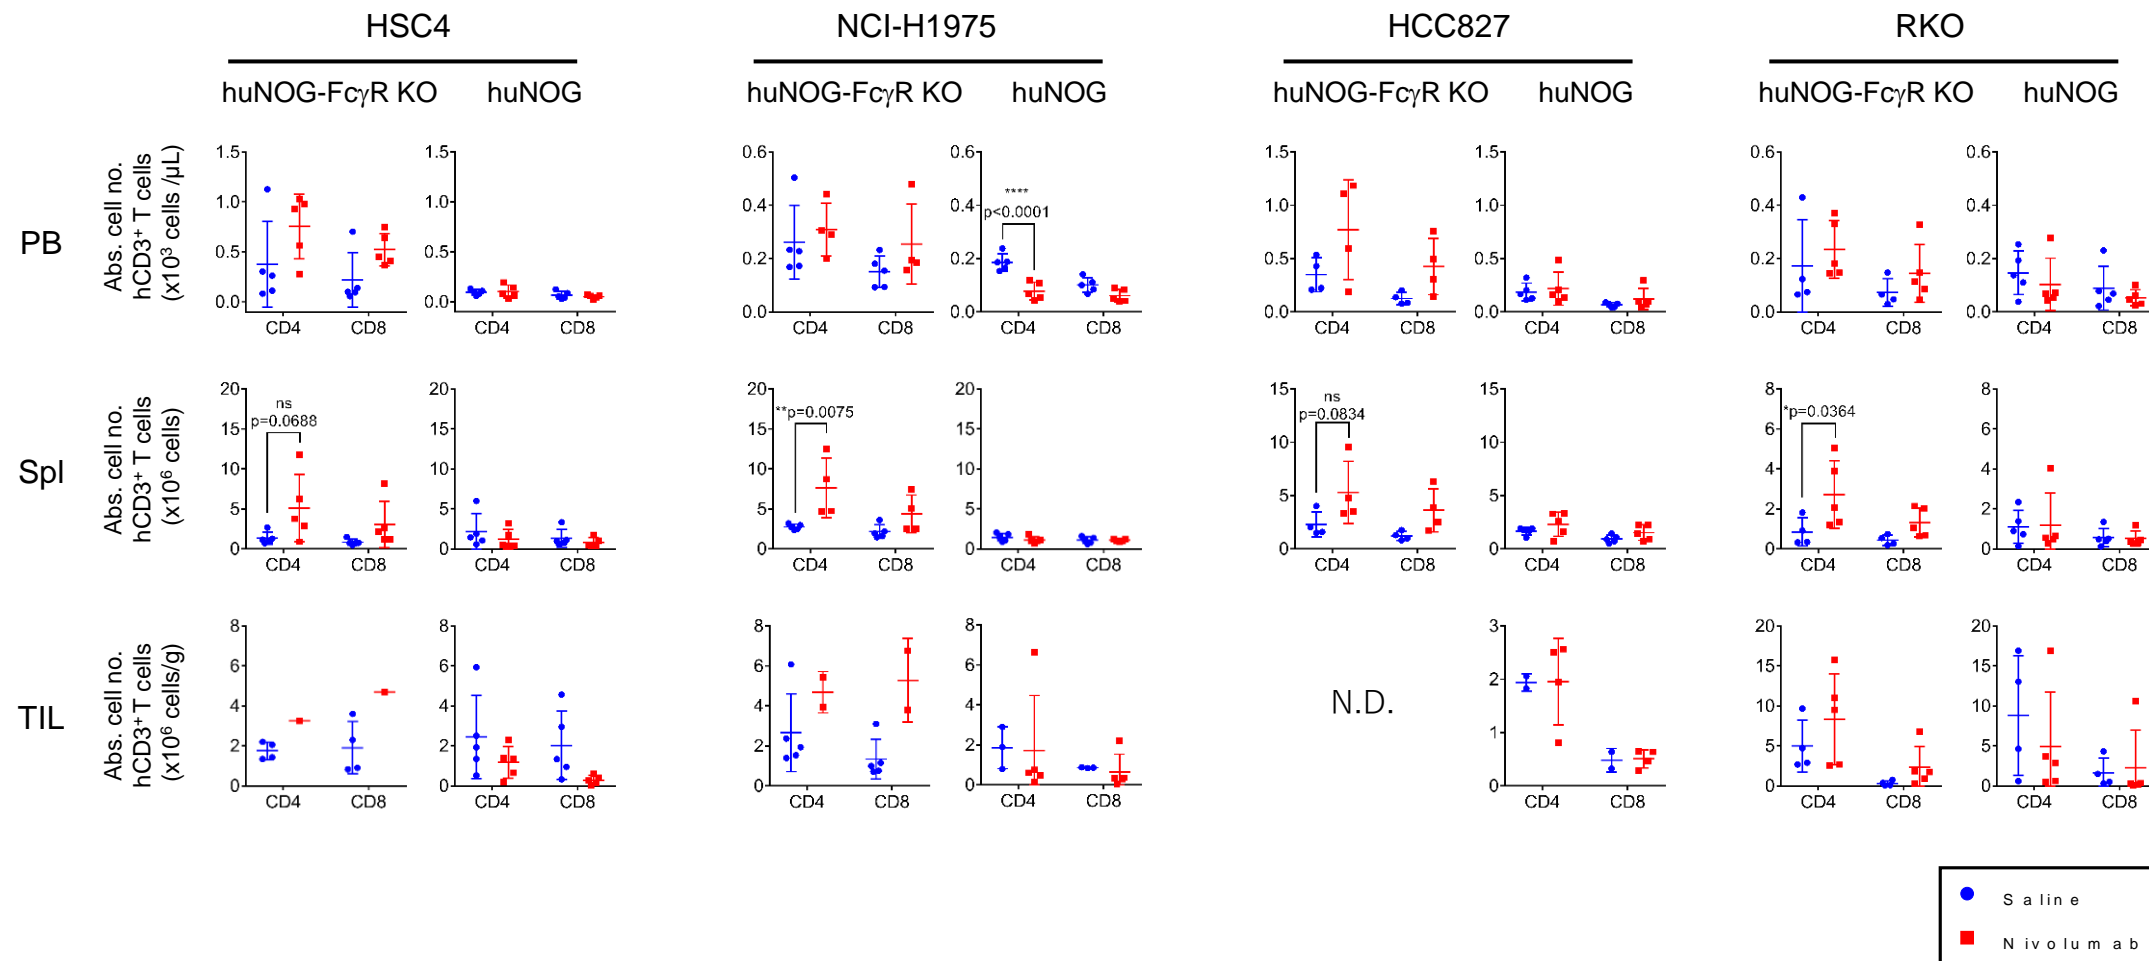

# Supplementary Figure 9

**a**

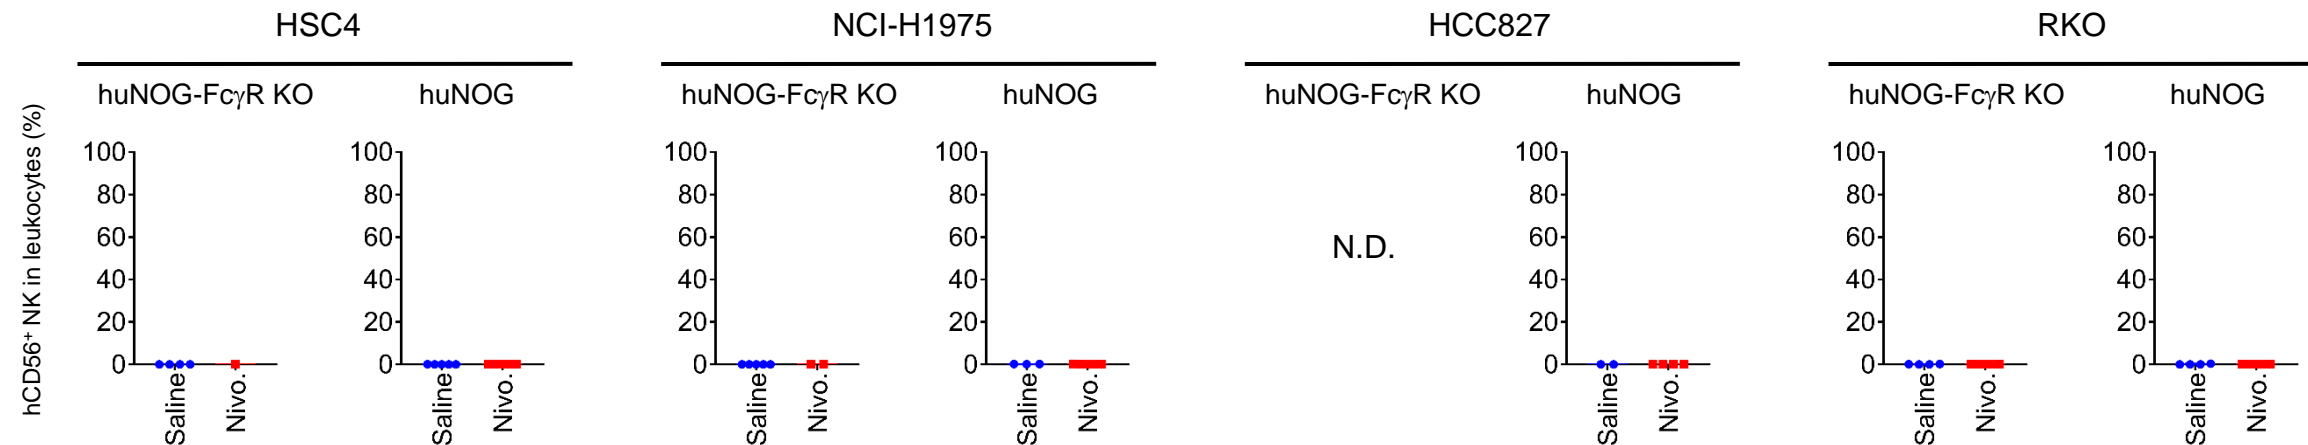

**b**

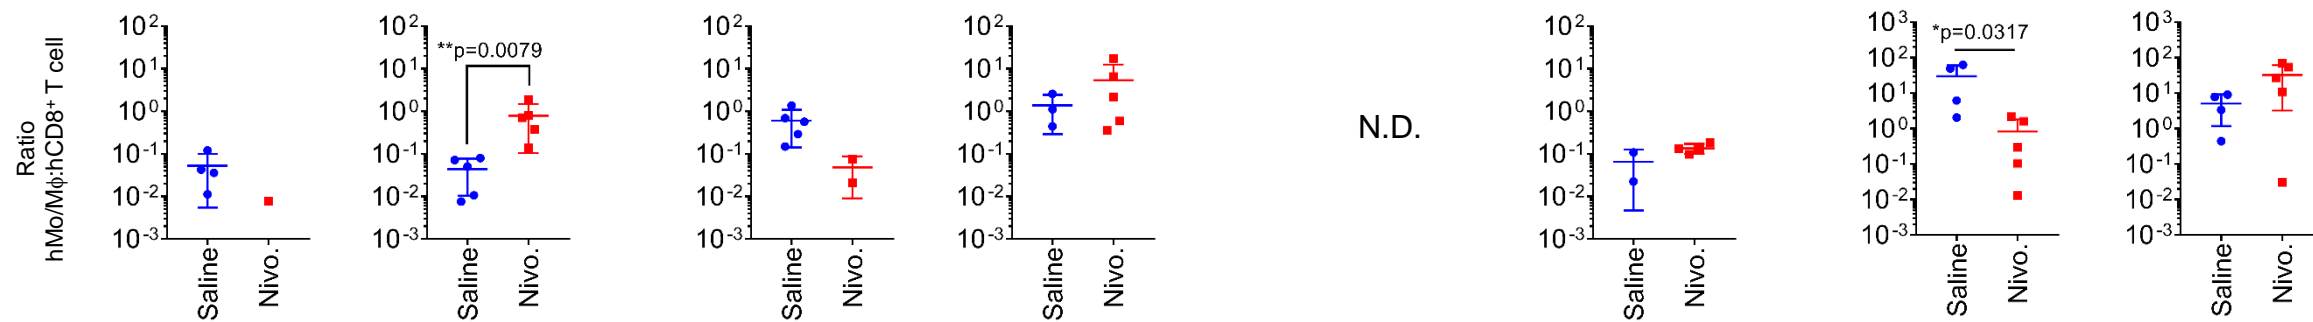

# Supplementary Figure 10

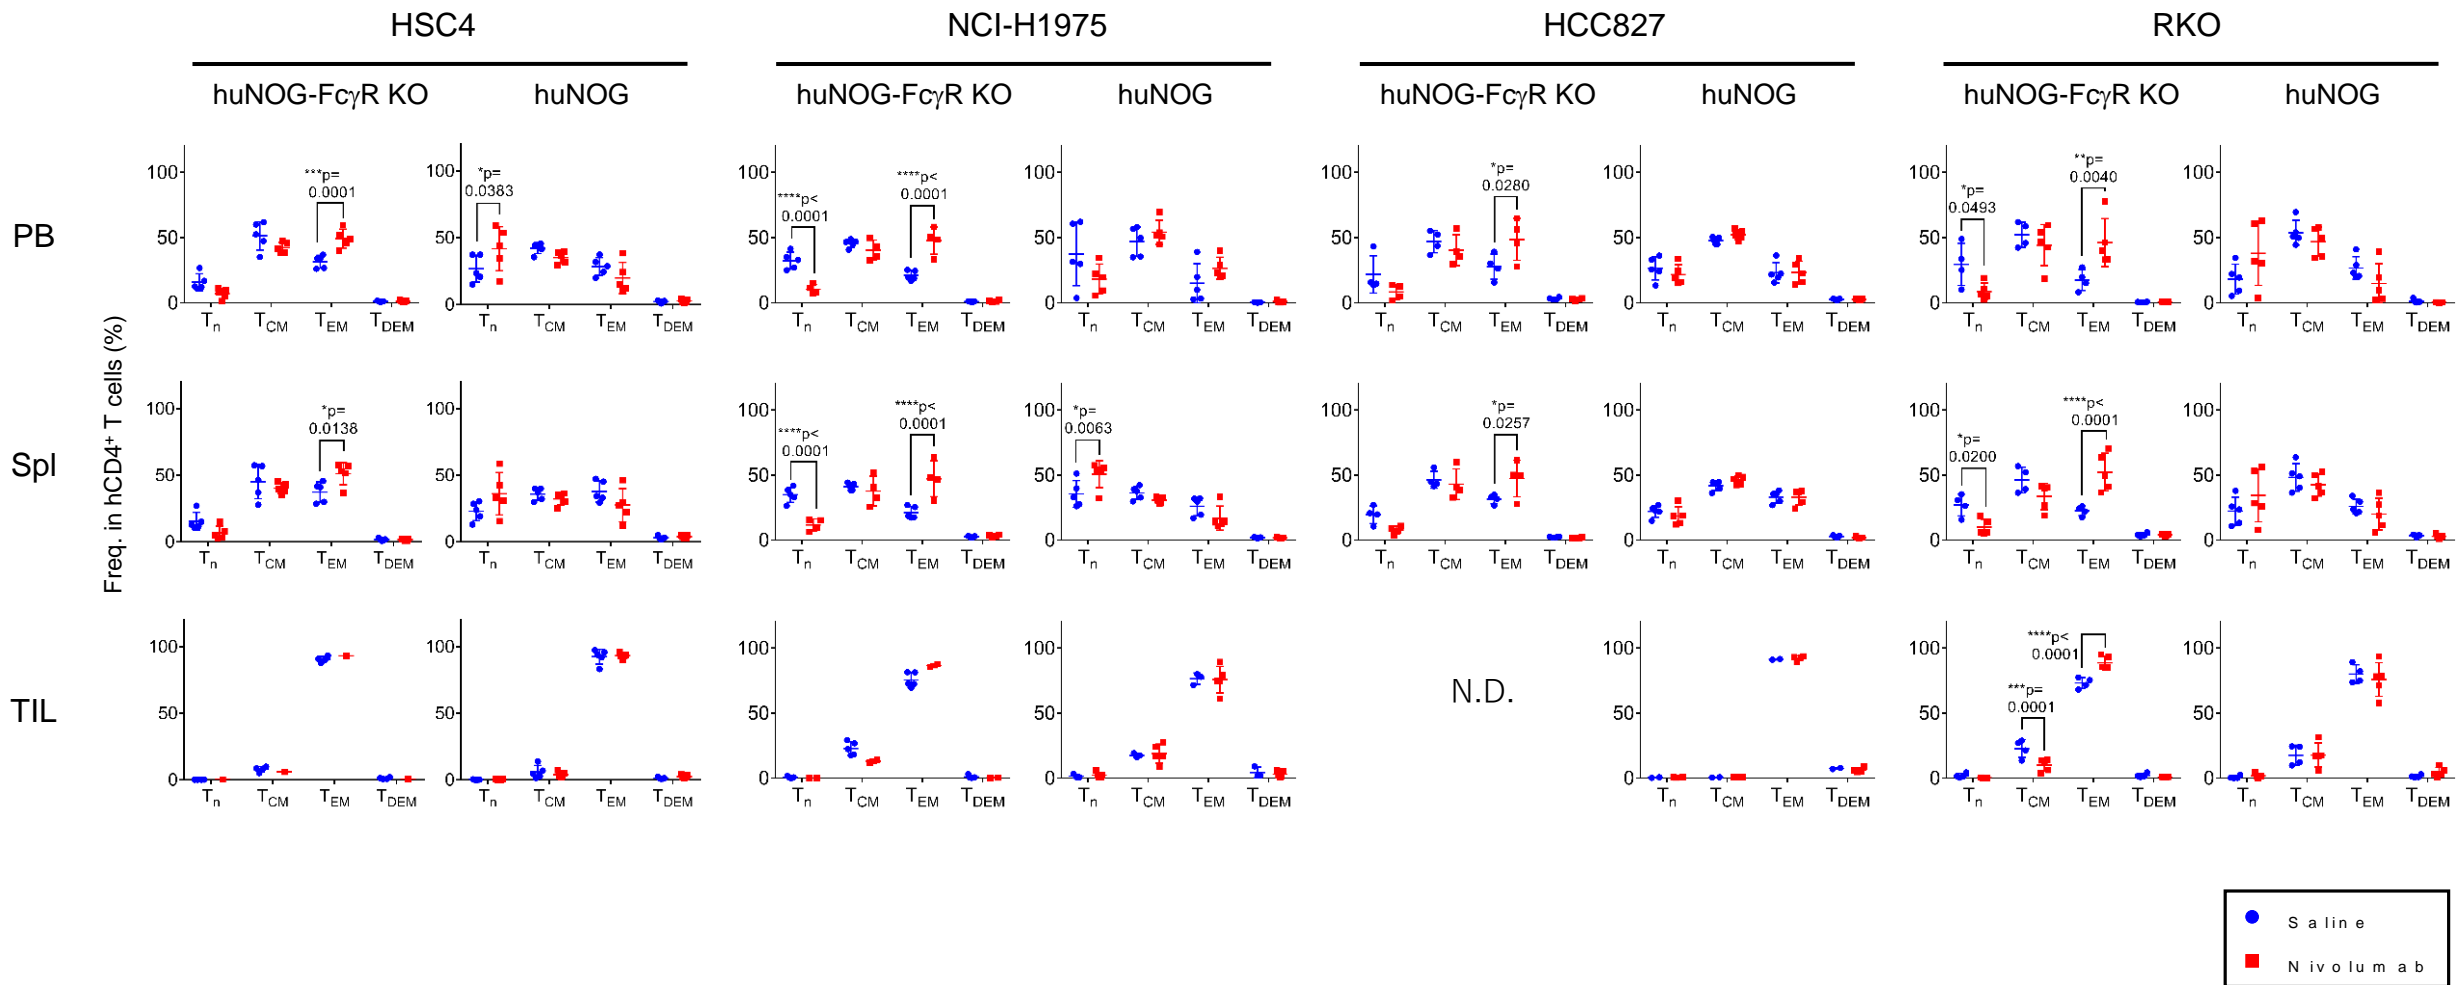



# Supplementary Figure 11

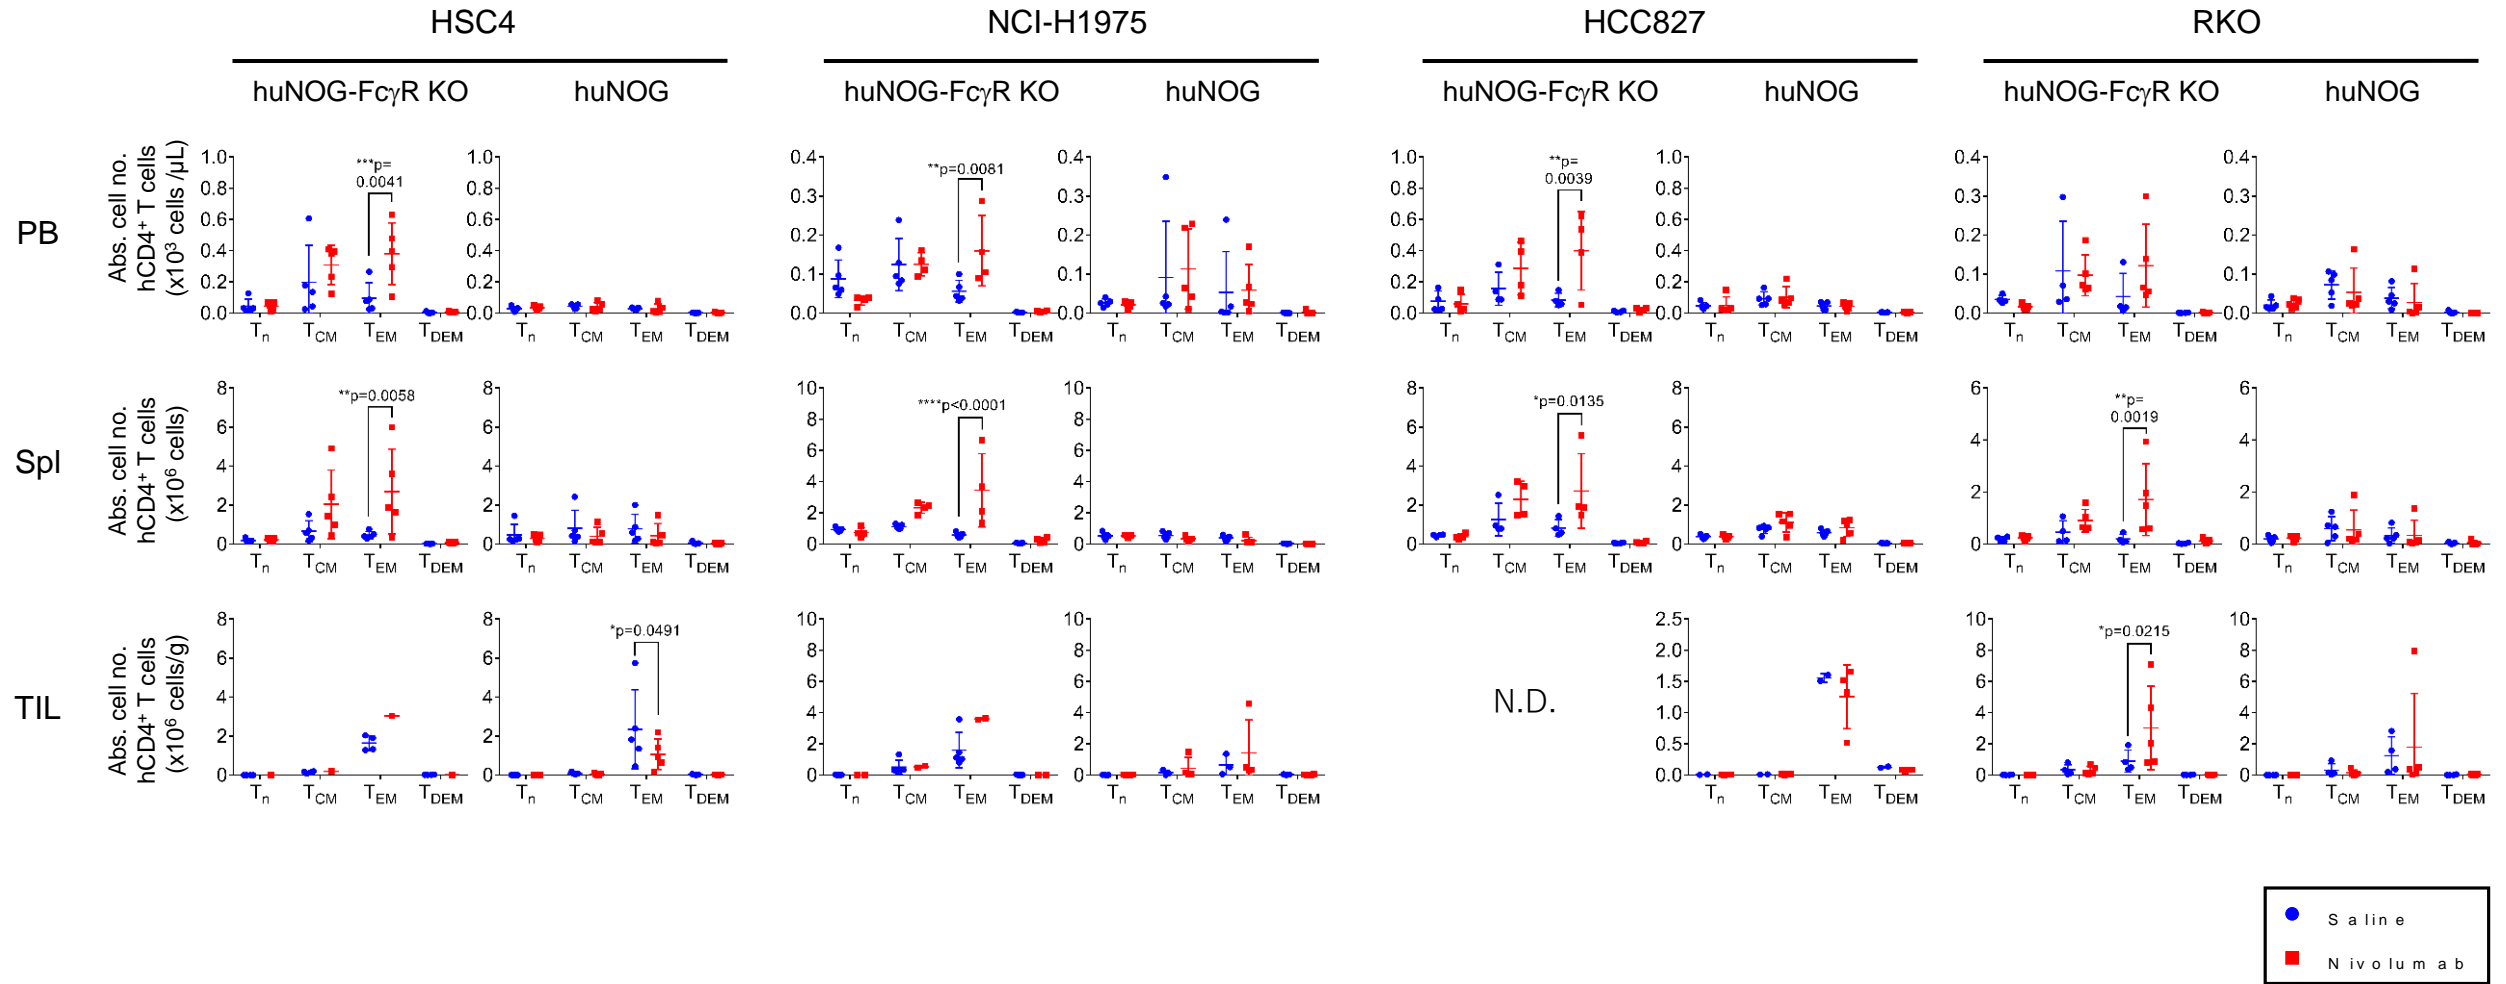

# Supplementary Figure 12

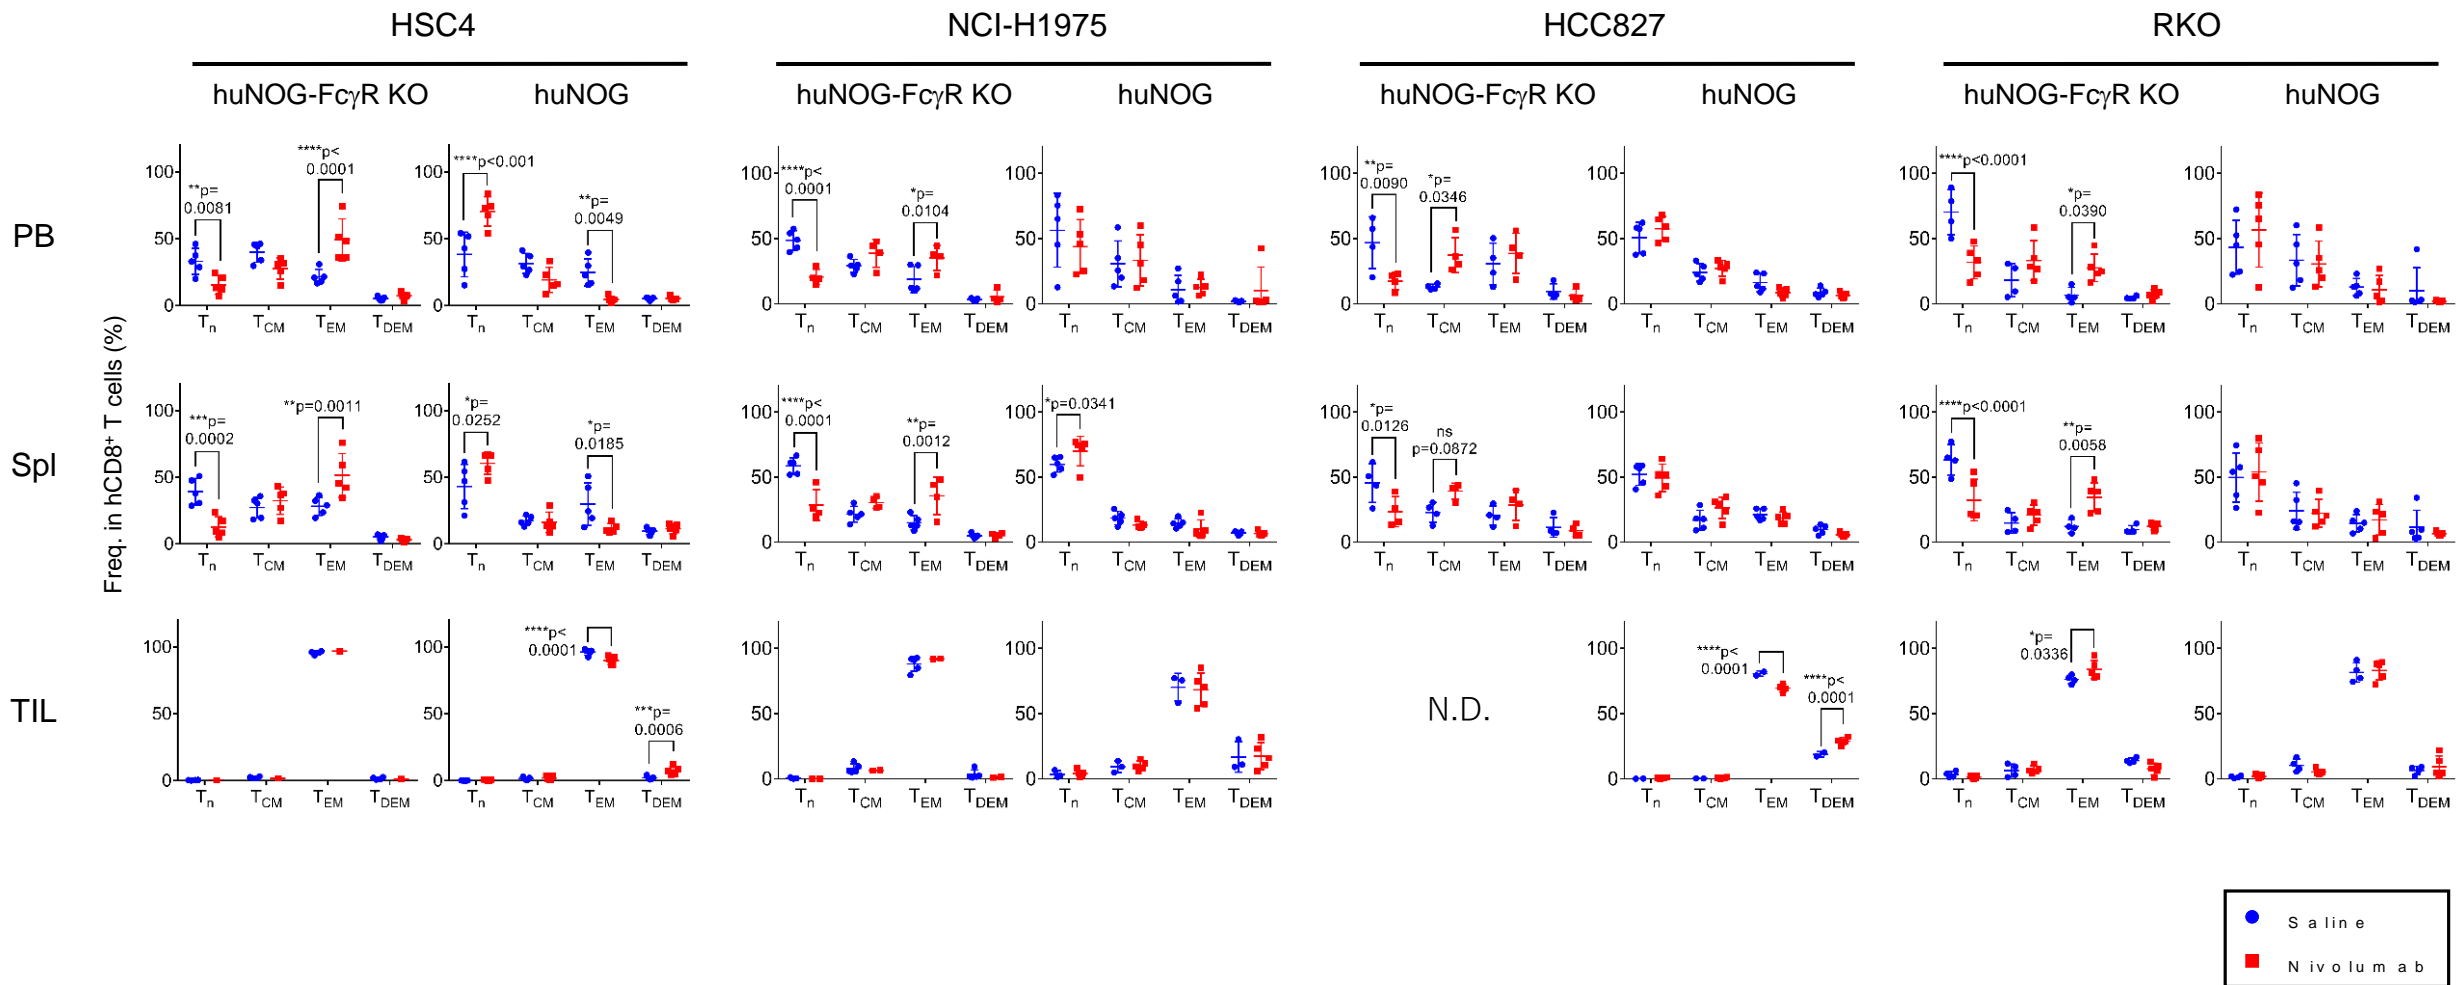

# Supplementary Figure 13

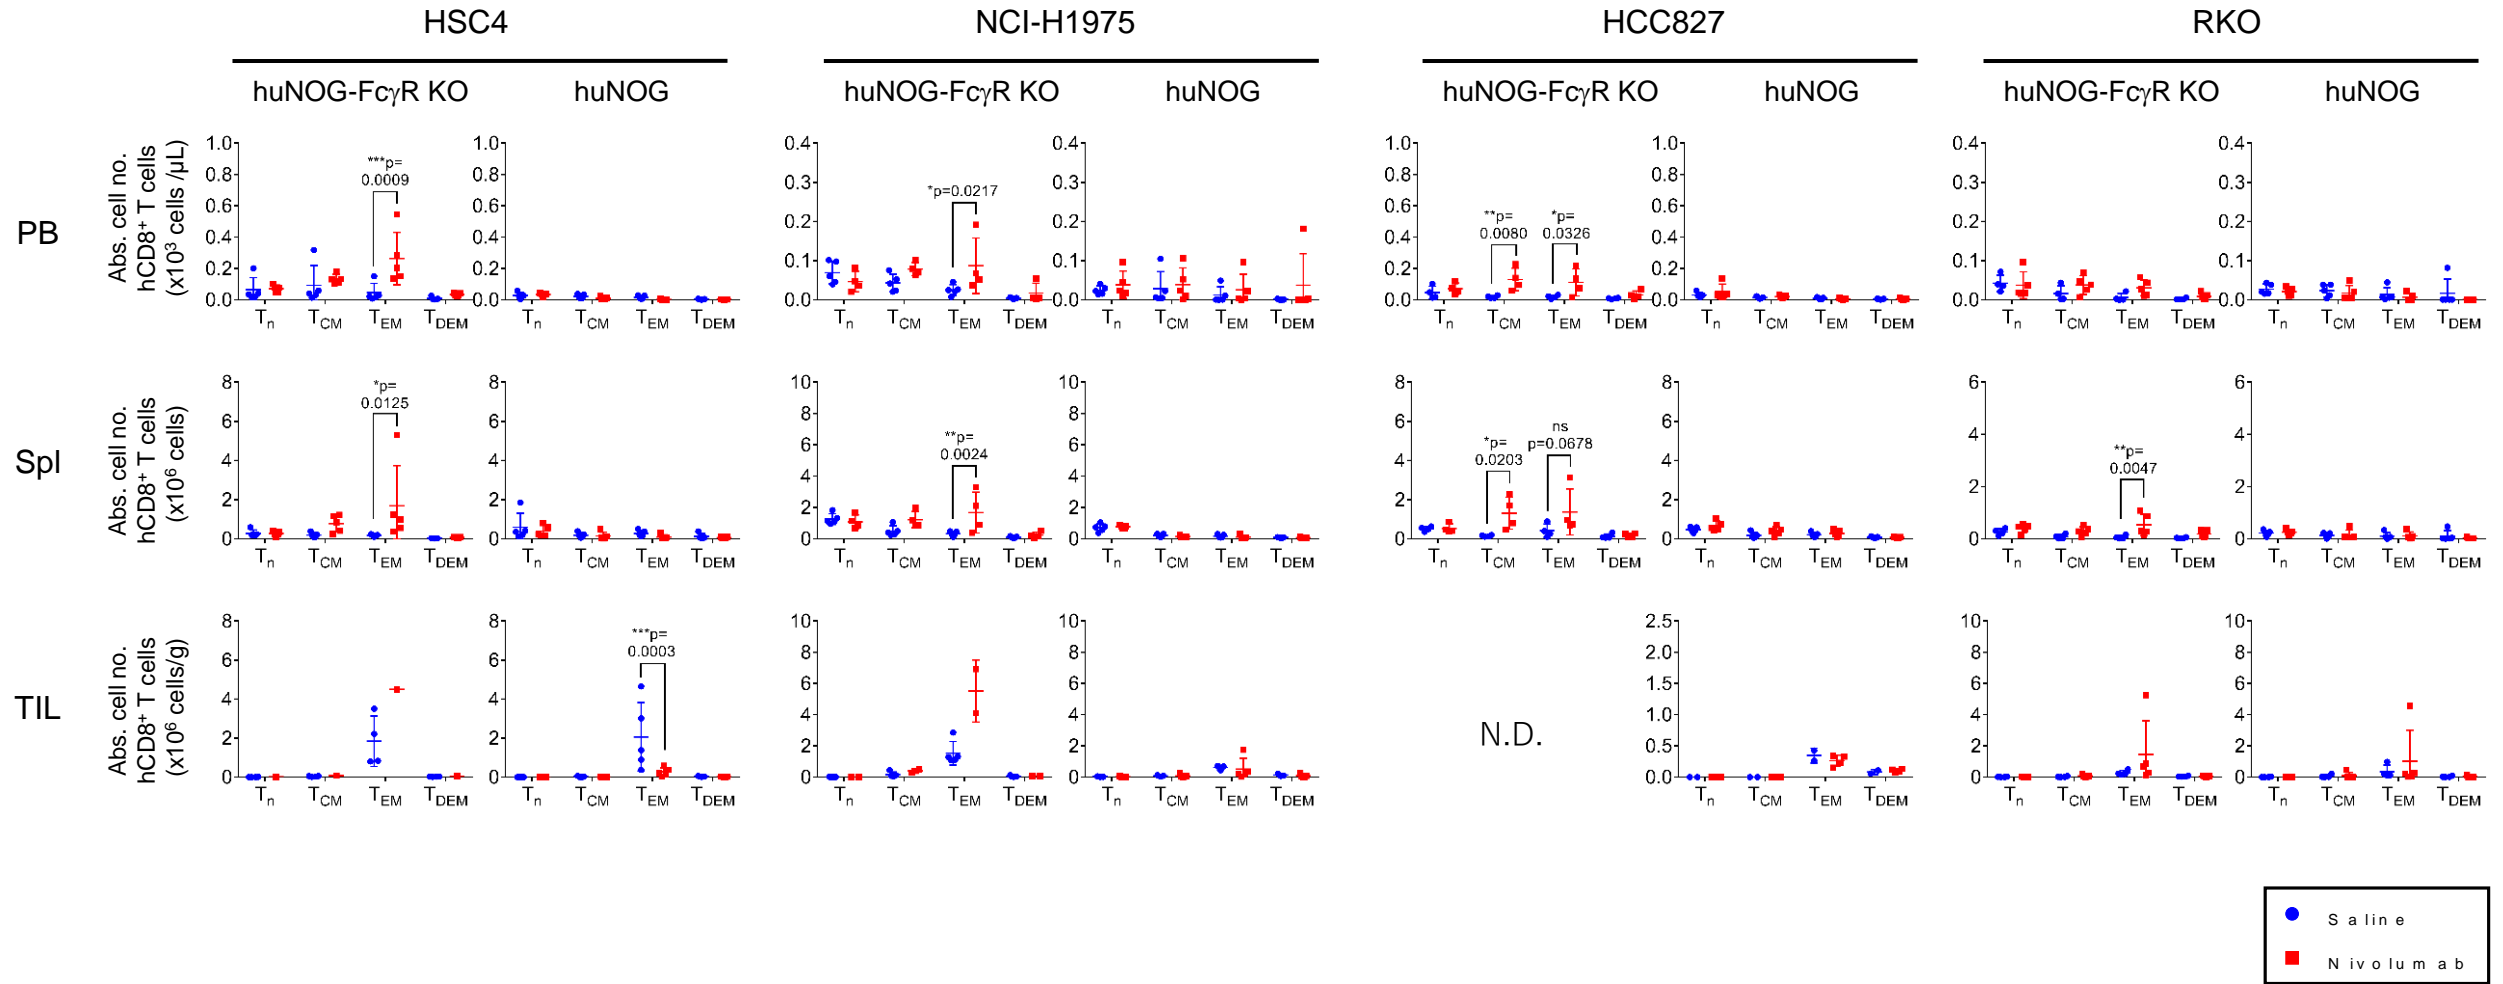



Supplementary Figure 14

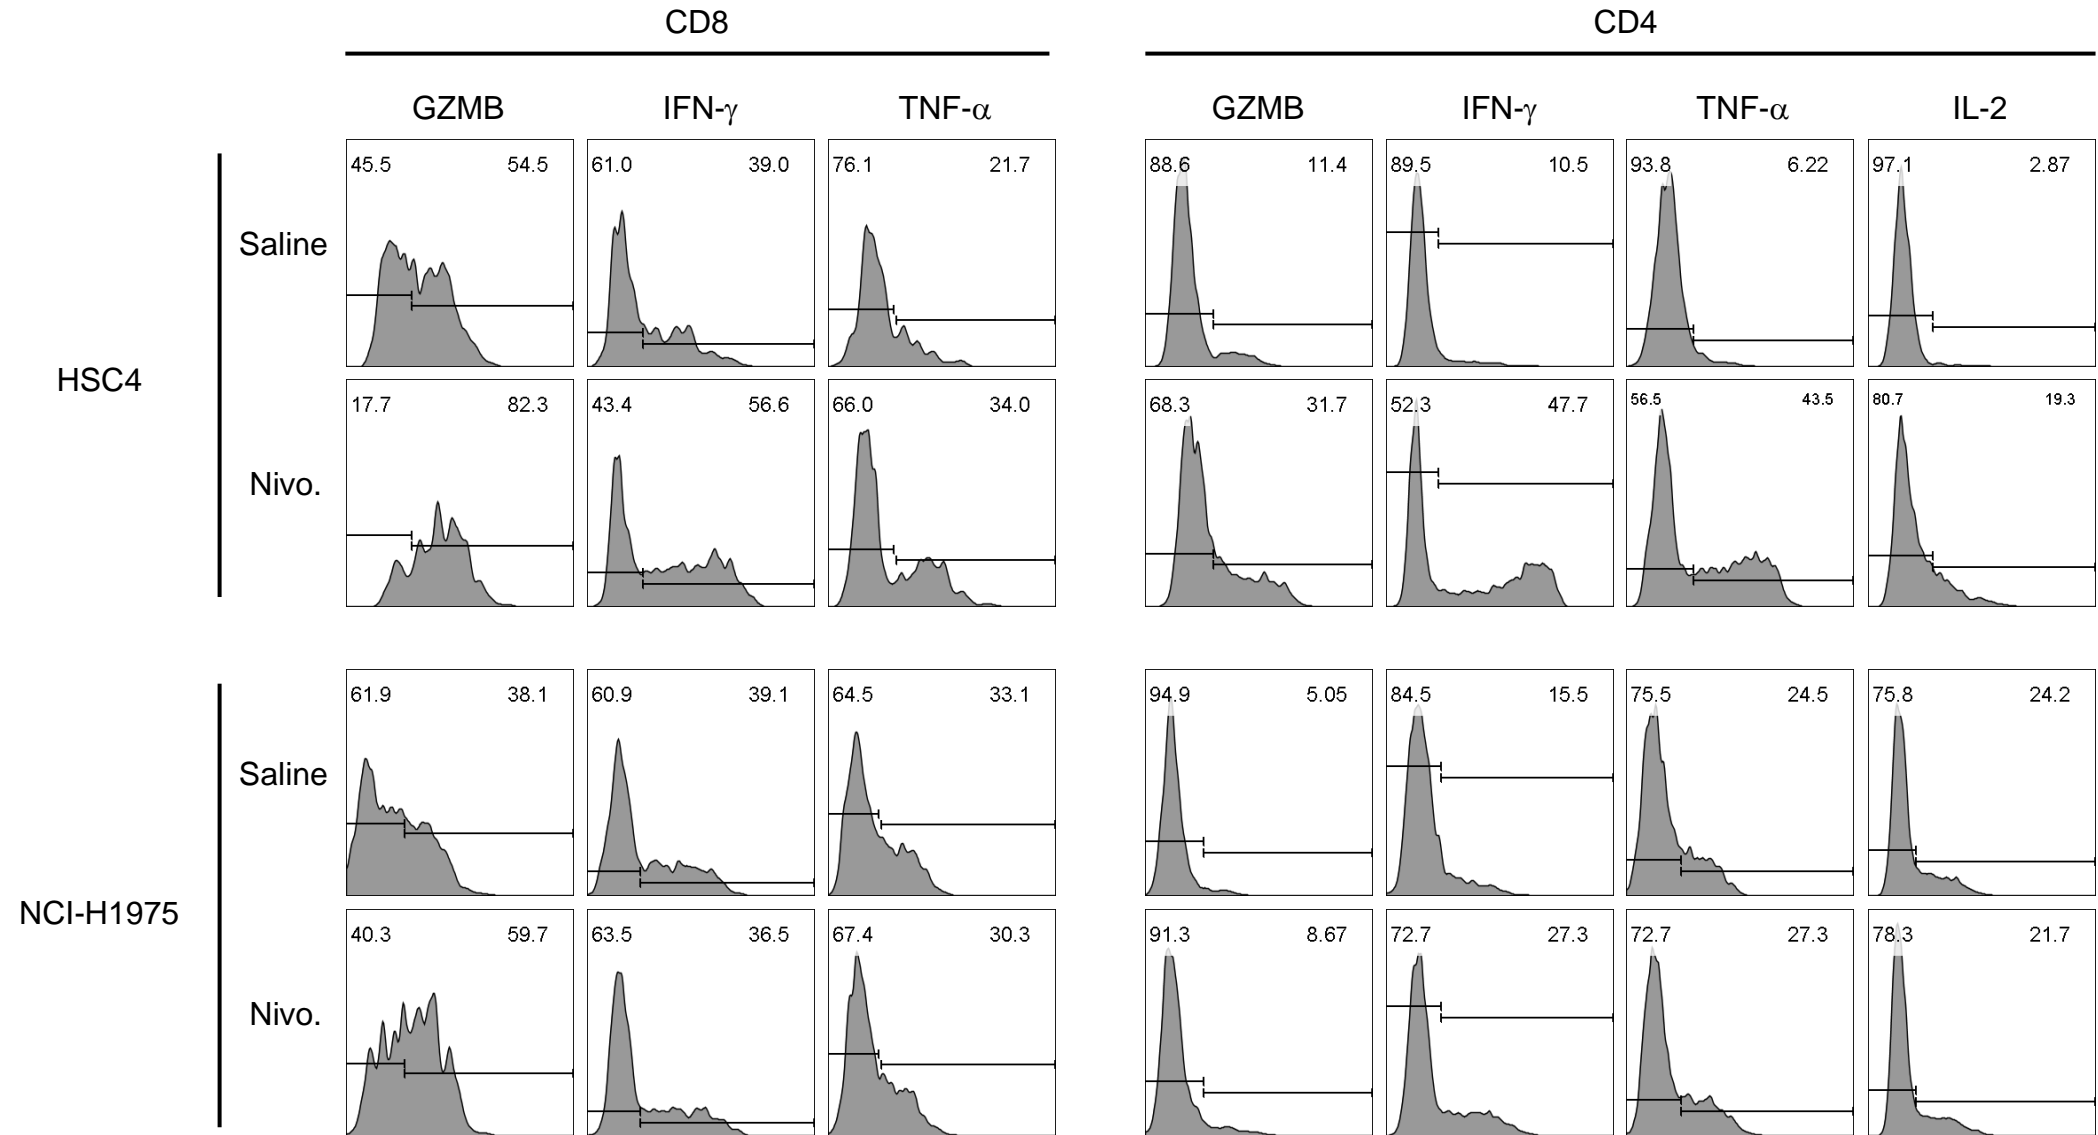

Supplementary Figure 15

HSC4 TIL

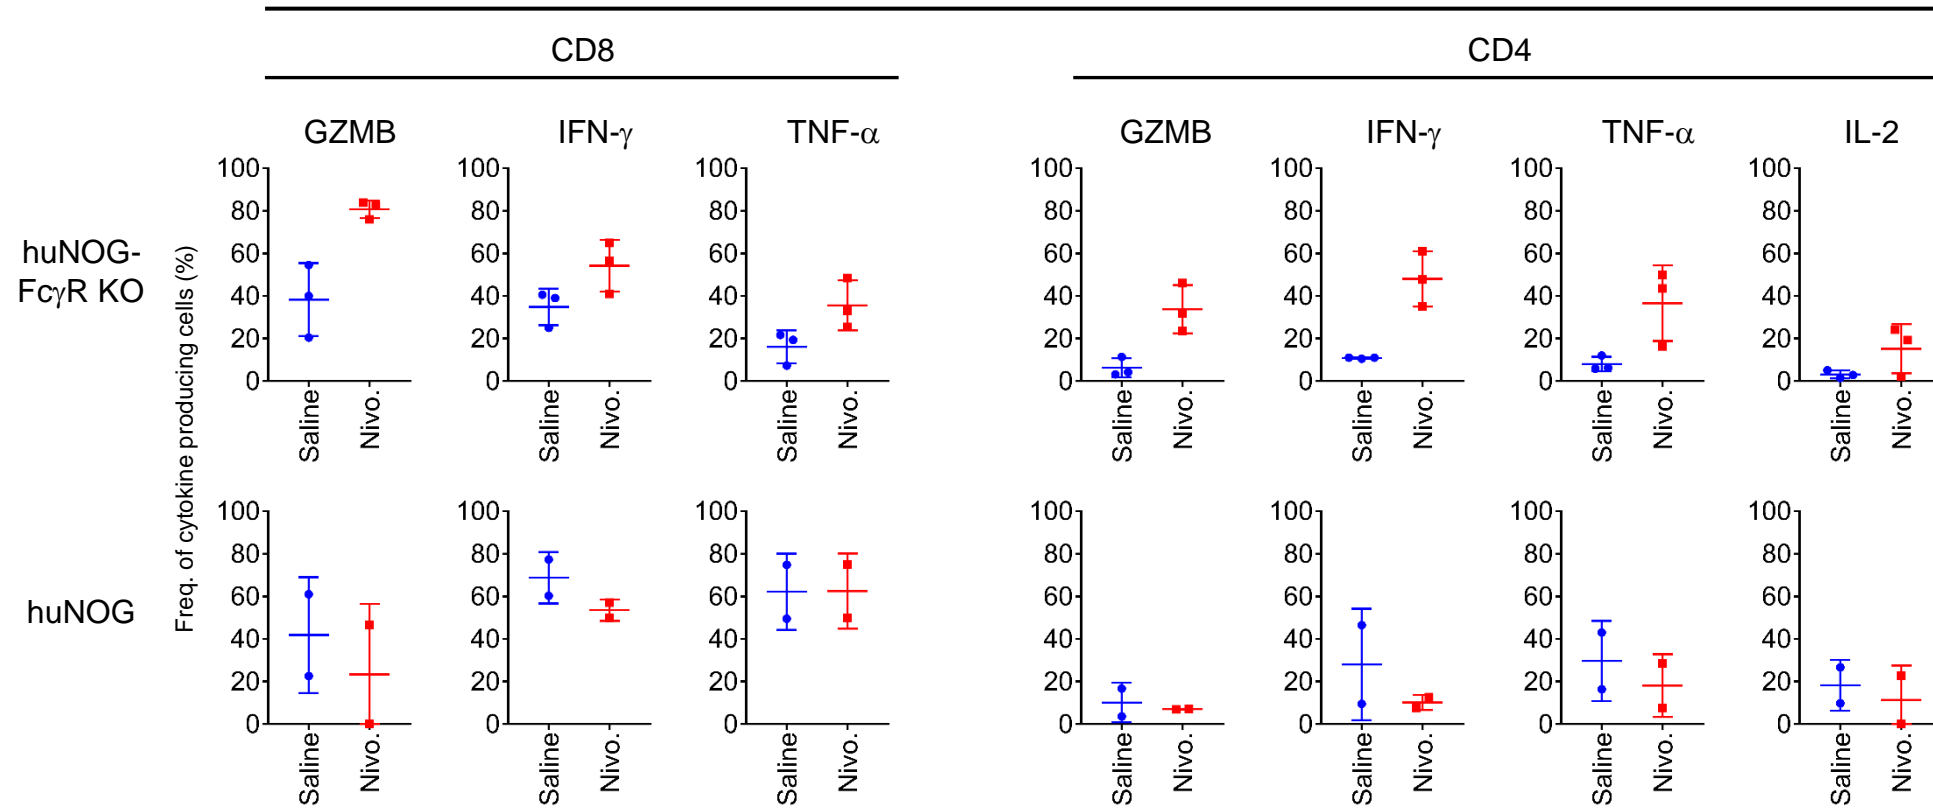

NCI-H1975 TIL

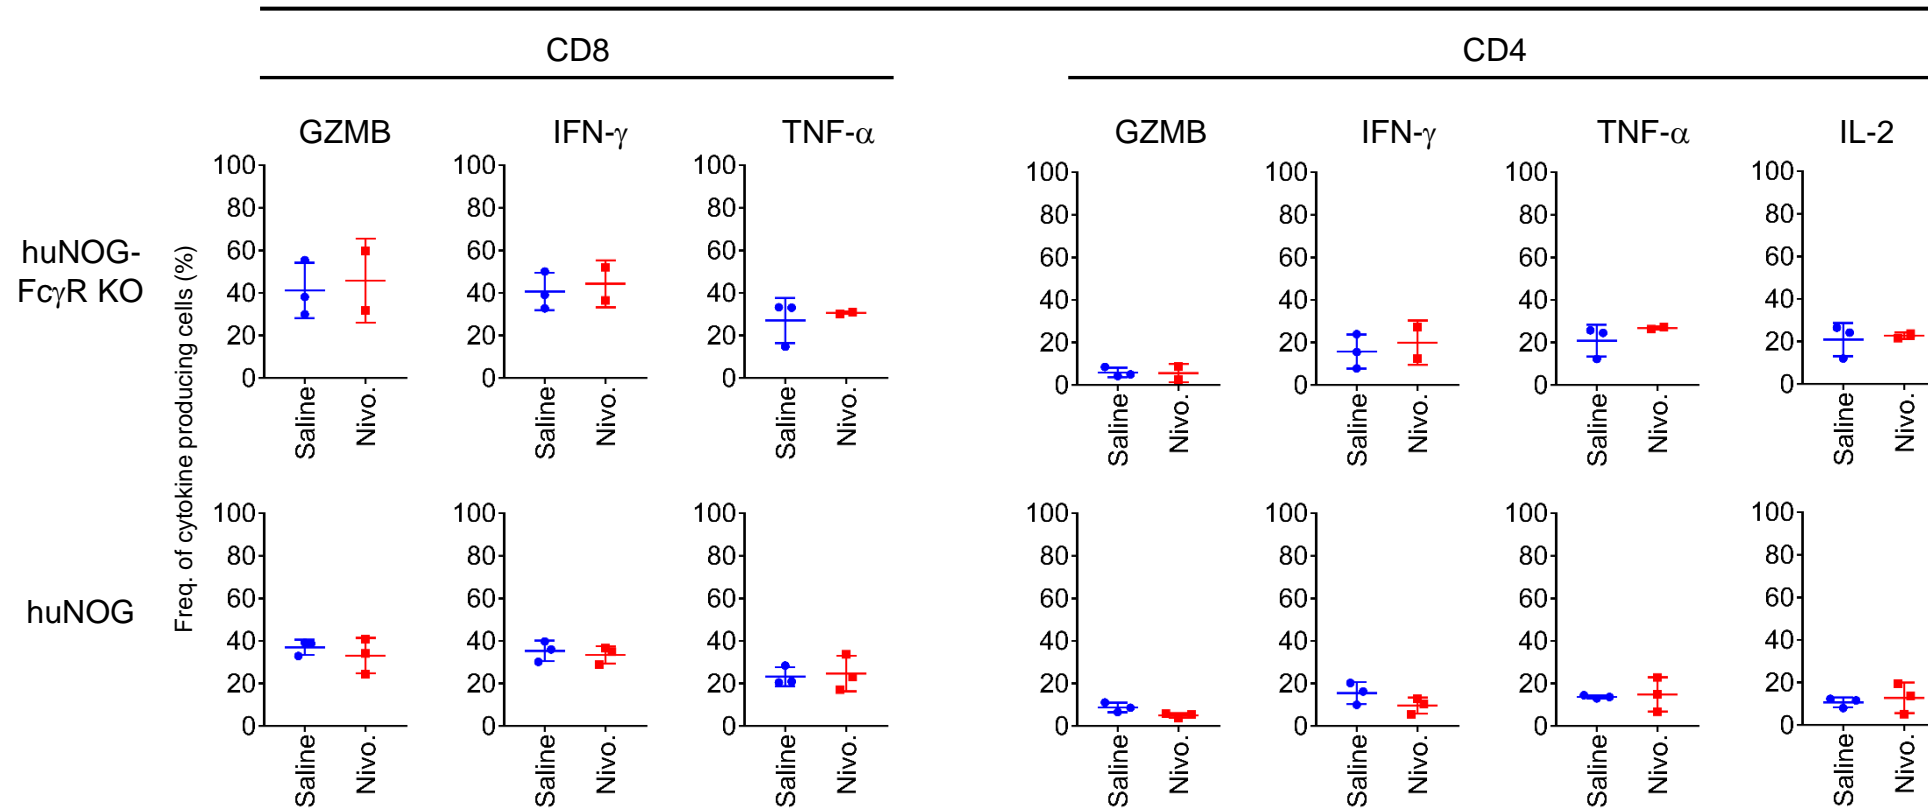



# Supplementary Figure 17

RKO Spl

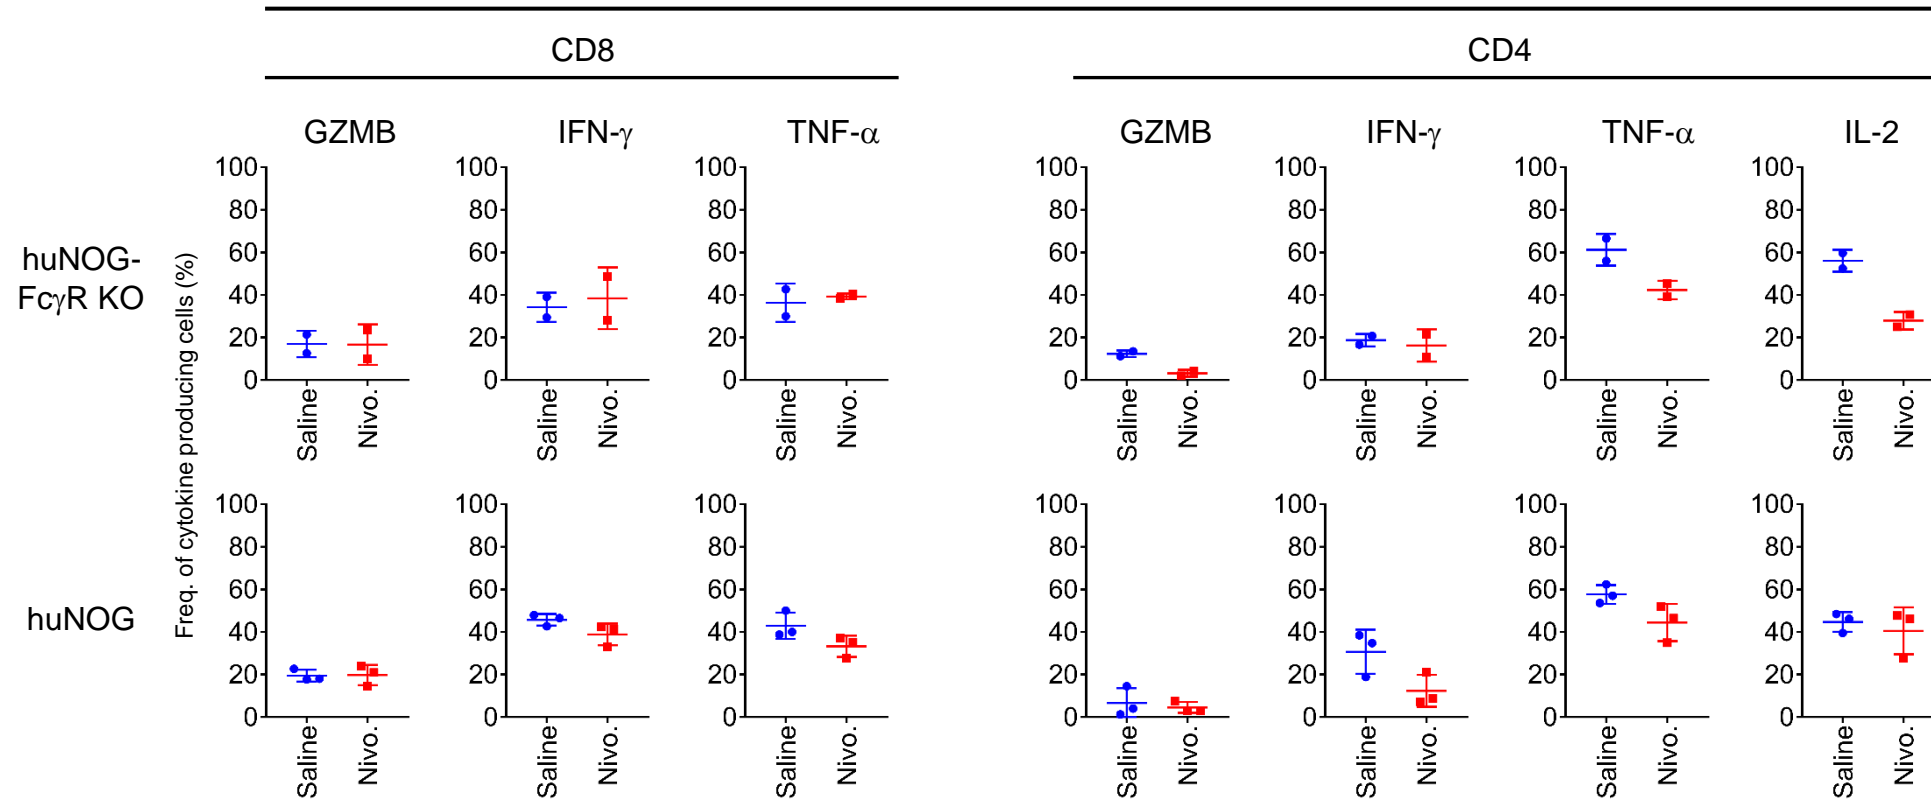

# Supplementary Figure 18

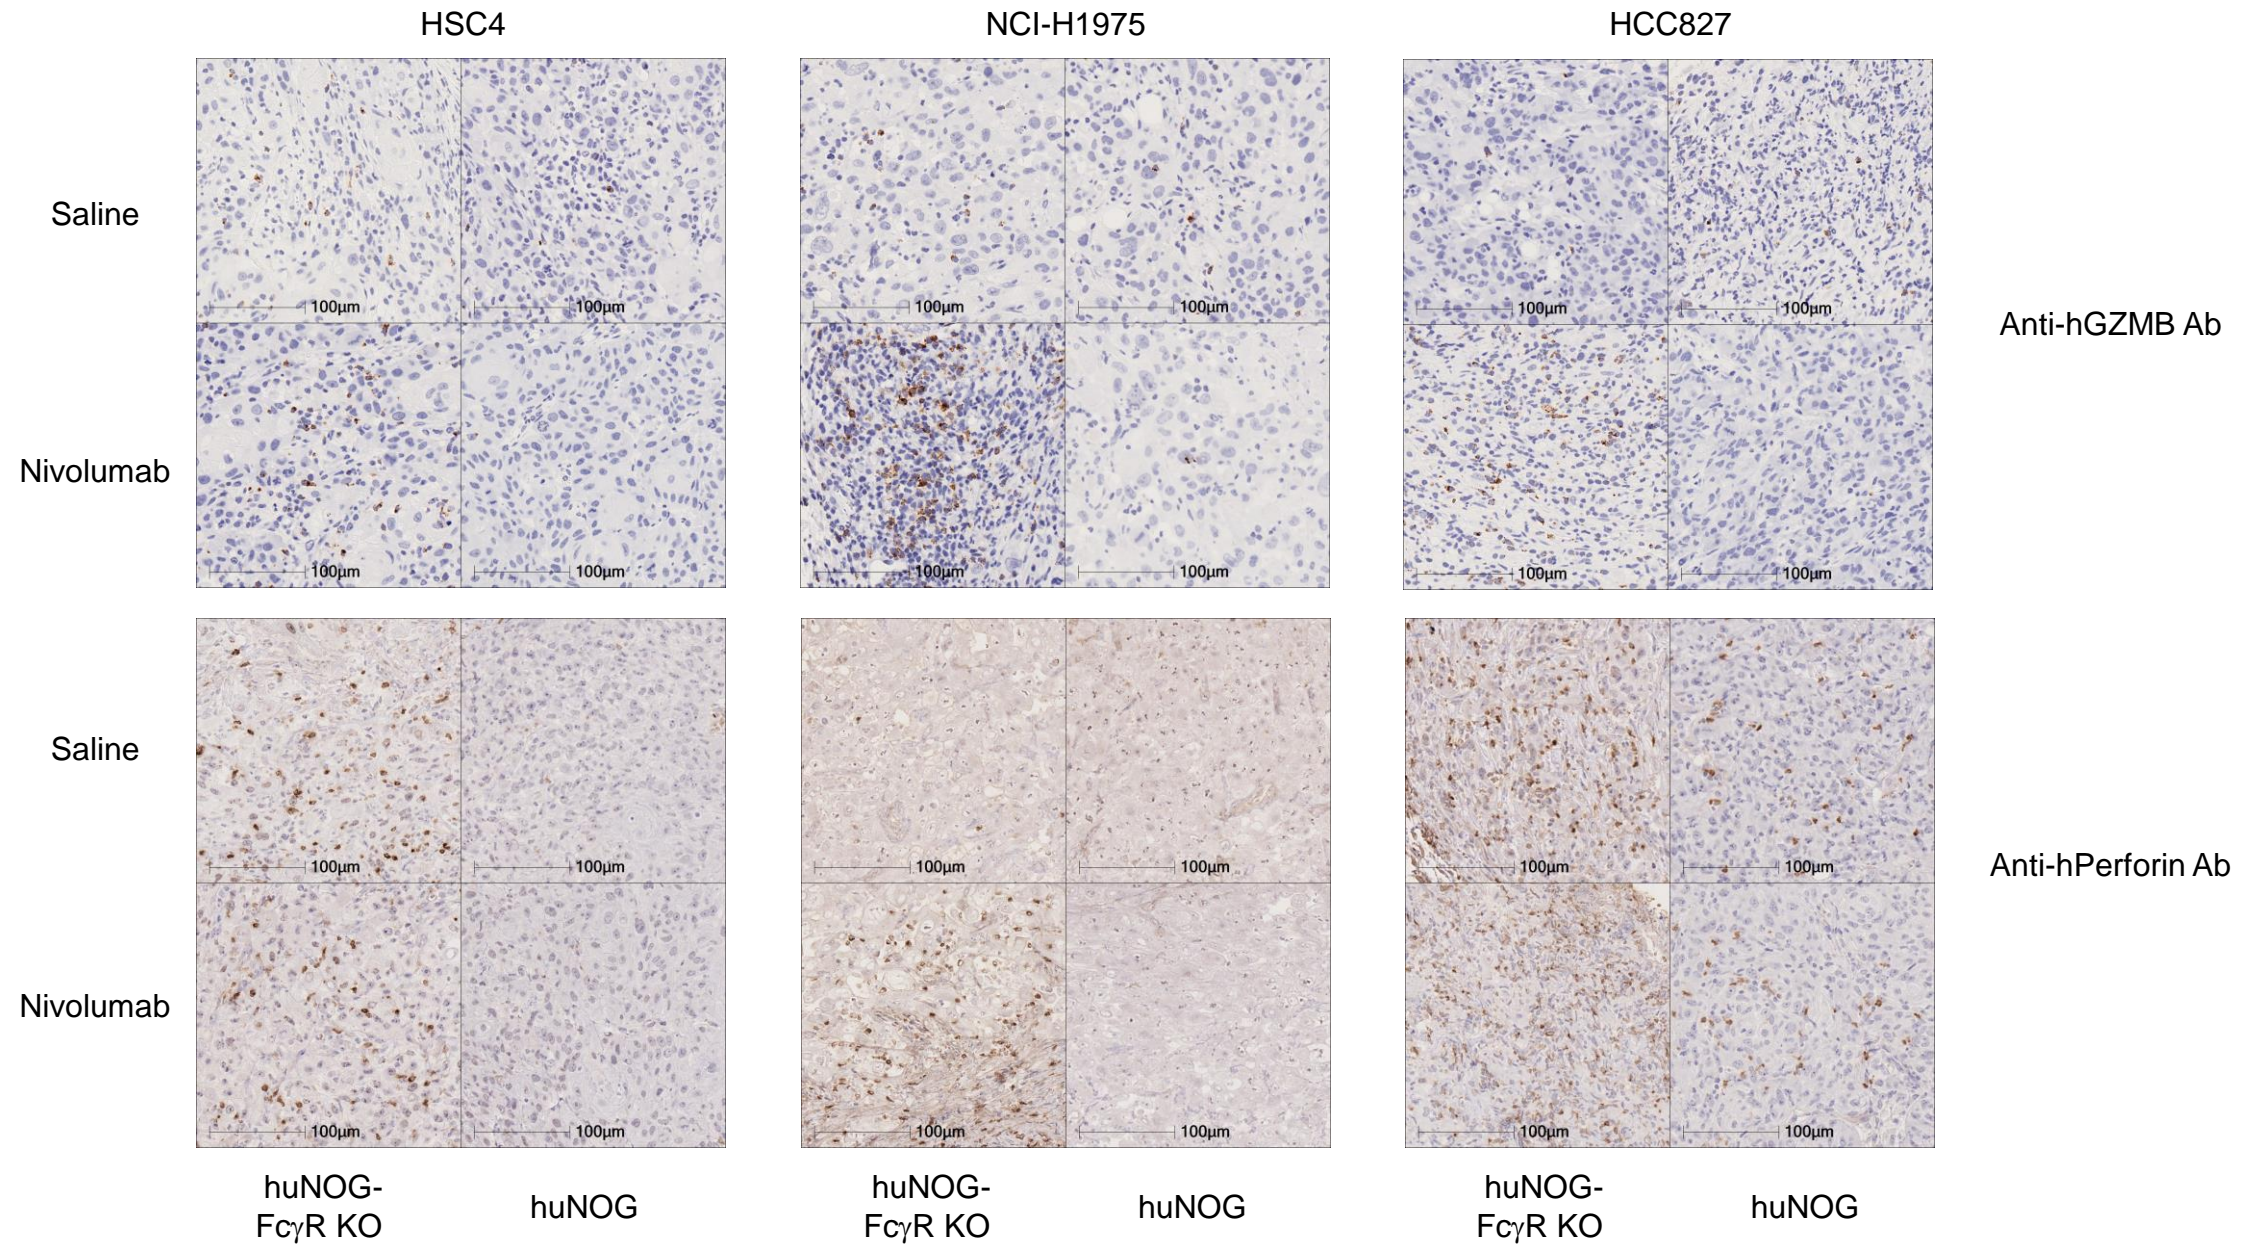

# Supplementary Figure 19

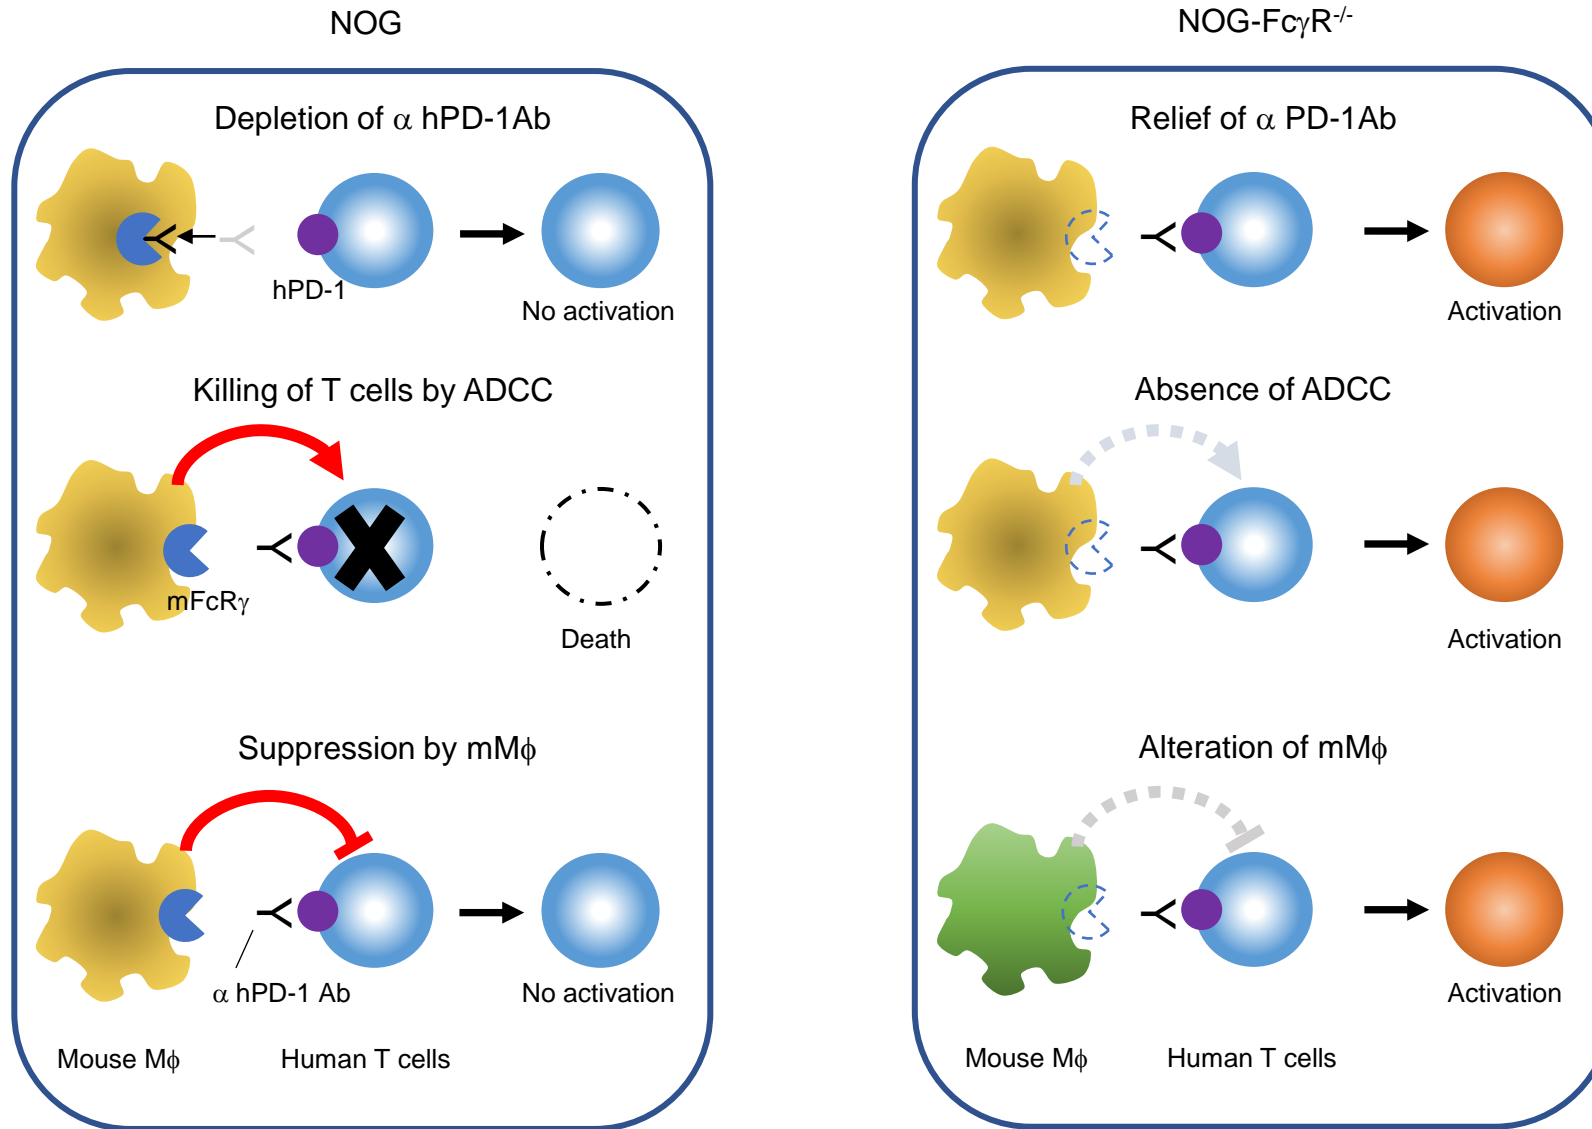

T cell activation by nivolumab in huNOG-Fc $\gamma$ R<sup>-/-</sup> mice
